# Supplementary material
Source: PubMed Central journal article supplement (PMC10548359)
Supplement: jama-e2319869-s001.pdf [file jama-e2319869-s001.pdf]

1 Title page  
2  
3 A Randomised Placebo Controlled Trial of the effectiveness of Early METformin in Addition to Usual  
4 Care in the Reduction of Gestational Diabetes Mellitus Effects (EMERGE)  
5  
6 Protocol Version no.: 6.0 Date:02-May- 2019  
7  
8 Test Drug: Metformin  
9  
10 Clinical Phase: III  
11  
12 EudraCT number: 2016-001644-19  
13  
14 Sponsor Number: NUIG-2016-01  
15  
16 Principal Investigator: Prof. Fidelma Dunne  
17 School of Medicine  
18 Clinical Science Institute  
19 National University of Ireland, Galway  
20 Galway, Ireland  
21 Fidelma.Dunne@nuigalway.ie  
22  
23 Co-ordinating Centre: HRB Clinical Research Facility Galway  
24 National University of Ireland Galway  
25 University Hospital Galway  
26 Newcastle Road  
27 Galway, Ireland  
28 (091) 495 964  
29  
30 Sponsor: Prof. Lokesh Joshi  
31 (Vice President of Research)  
32 National University of Ireland Galway  
33 University Road  
34 Galway  
35 (091) 495 678  
36  
37  
38 The study will be conducted in compliance with the protocol, International Conference on  
39 Harmonization – Good Clinical Practice (ICH-GCP) and any applicable regulatory requirements.  
40  
41

**Confidential**

This document contains confidential information that must not be disclosed to anyone other than the sponsor, the investigative team, regulatory authorities, and members of the research ethics committee.

42  
43  
44  
45

46  
47  
48  
49  
50  
51  
52  
53  
54  
55  
56  
57  
58  
59  
60  
61

**1. SPONSOR PROTOCOL AGREEMENT PAGE**

I, the undersigned, am responsible for the overall conduct of the trial and agree to the content of the final clinical trial protocol, as presented.

Signed

\_\_\_\_\_

Sponsor Representative

\_\_\_\_\_

Date

62 **2. INVESTIGATOR PROTOCOL AGREEMENTS**

63

64 **2.1. Chief Investigator Agreement**

65

66 I, the undersigned, agree to the content of the final clinical trial protocol, as presented.

67

68 Signed

69

70

71

72

73

74 \_\_\_\_\_  
Chief Investigator

\_\_\_\_\_ Date

75

76

77

78

79

80

81

82

83

84

85

86

87

88

89

90

91

92

93

94

95

96

97

98

99

100

101

102

103

104

105

106

107

108

109

110

111 **2.2 Site Investigator Agreement**

112

113 I, the undersigned, am responsible for the conduct of the trial at this site and agree to the following:  
114 I understand and will conduct the trial according to the protocol, any approved protocol amendments,  
115 ICH GCP and all applicable regulatory authority requirements and national laws.

116 I will not deviate from the protocol without prior written approval from the HPRA and the Ethics  
117 Committee, except where necessary to prevent any immediate danger to the participant.

118 I have sufficient time to properly conduct and complete the trial within the agreed trial period, and I  
119 have available an adequate number of qualified staff and adequate facilities for the foreseen duration  
120 of the trial to conduct the trial properly and safely. I will ensure that any staff at my site(s) who are  
121 involved in the trial conduct are adequately trained regarding the protocol and their responsibilities.

122

123 Signed

124

125

126

127

128

129 \_\_\_\_\_  
Principal Investigator

\_\_\_\_\_

Date

130

131

132

133

134

135

136

137

138

139

140

141

142

143

144

145

146

147

148

149

150

151

152

153

154

155

156

157

158

159

160

|     |                   |                                                                              |    |
|-----|-------------------|------------------------------------------------------------------------------|----|
| 161 | Table of Contents |                                                                              |    |
| 162 |                   |                                                                              |    |
| 163 | 1.                | SPONSOR PROTOCOL AGREEMENT PAGE                                              | 2  |
| 164 | 2.                | INVESTIGATOR PROTOCOL AGREEMENTS                                             | 3  |
| 165 | 2.1               | Chief Investigator Agreement                                                 | 3  |
| 166 | 2.2               | Site Investigator Agreement                                                  | 4  |
| 167 | 3.                | DOCUMENT HISTORY                                                             | 8  |
| 168 | 4.                | SYNOPSIS                                                                     | 16 |
| 169 | 5.                | ABBREVIATIONS                                                                | 19 |
| 170 | 6.                | INTRODUCTION                                                                 | 22 |
| 171 | 6.1               | BACKGROUND INFORMATION                                                       | 22 |
| 172 | 6.1.1             | What is Gestational Diabetes Mellitus?                                       | 22 |
| 173 | 6.1.2             | How common is Gestational Diabetes Mellitus?                                 | 22 |
| 174 | 6.1.3             | Why is Gestational Diabetes Mellitus Clinically Important in the Short Term? | 22 |
| 175 | 6.1.4             | Why is Gestational Diabetes Mellitus Clinically Important in the Long Term?  | 23 |
| 176 | 6.1.5             | Does Treating GDM Improve Clinical Outcomes?                                 | 23 |
| 177 | 6.1.6             | Limitations of Insulin Therapy                                               | 23 |
| 178 | 6.1.7             | Metformin use for GDM                                                        | 24 |
| 179 | 6.2               | RATIONALE FOR THE STUDY                                                      | 25 |
| 180 | 7.                | STUDY OBJECTIVES                                                             | 26 |
| 181 | 7.1               | Primary objective                                                            | 26 |
| 182 | 7.2.              | Secondary objectives                                                         | 26 |
| 183 | 7.3.              | Primary and secondary outcome measures                                       | 26 |
| 184 | 7.3.1             | Primary Outcome Measure                                                      | 26 |
| 185 | 7.3.2             | Secondary Outcome Measures                                                   | 27 |
| 186 | 8.                | TRIAL DESIGN                                                                 | 27 |
| 187 | 8.1.              | Design Summary                                                               | 27 |
| 188 | 8.1.1             | Treatment Group                                                              | 27 |
| 189 | 8.1.2             | Placebo Group                                                                | 27 |
| 190 | 8.1.3             | Usual Care                                                                   | 27 |
| 191 | 8.2.              | Selection of Study Population                                                | 29 |
| 192 | 8.2.1             | Population                                                                   | 29 |
| 193 | 8.2.2             | Inclusion Criteria                                                           | 29 |
| 194 | 8.2.3             | Exclusion Criteria                                                           | 29 |
| 195 | 8.3.              | Study Visits and procedures                                                  | 30 |
| 196 | 8.3.1             | Screening and Randomisation Visit and Procedures                             | 30 |
| 197 | 8.3.2             | Prenatal Visit and Procedures                                                | 31 |
| 198 | 8.3.3             | Delivery Visit                                                               | 31 |
| 199 | 8.3.4             | Phone Visit (Visit 1 Post-Partum)                                            | 32 |
| 200 | 8.3.5             | 12 Week Post-Partum Visit (Visit 2 Post-Partum)                              | 32 |
| 201 | 8.4               | Description of Study Procedures                                              | 35 |
| 202 | 8.4.1             | Informed Consent                                                             | 35 |
| 203 | 8.4.2             | Medical History                                                              | 35 |
| 204 | 8.4.3             | Physical Assessments                                                         | 36 |
| 205 | 8.4.4             | OGTT                                                                         | 36 |
| 206 | 8.4.5             | Laboratory Tests                                                             | 36 |
| 207 | 8.4.6             | Bio-banking                                                                  | 36 |
| 208 | 8.4.7             | Glucometer data                                                              | 37 |
| 209 | 8.4.8             | Study Drug Accountability                                                    | 37 |
| 210 | 8.4.9             | Neonatal Measurements                                                        | 37 |
| 211 | 8.5               | Randomisation                                                                | 38 |
| 212 | 8.6               | Blinding                                                                     | 38 |
| 213 | 8.6.1             | Emergency Unblinding                                                         | 38 |

|     |        |                                                                 |    |
|-----|--------|-----------------------------------------------------------------|----|
| 214 | 8.7    | Definition of end-of-trial                                      | 38 |
| 215 | 8.7.1  | Premature termination of the study                              | 39 |
| 216 | 8.8    | Discontinuation/withdrawal of participants from study treatment | 39 |
| 217 | 9.     | TREATMENT OF TRIAL PARTICIPANTS                                 | 40 |
| 218 | 9.1    | Description of study treatments                                 | 40 |
| 219 | 9.1.1  | Usual Care                                                      | 40 |
| 220 | 9.1.2  | Treatment Group                                                 | 40 |
| 221 | 9.1.3  | Placebo Group                                                   | 41 |
| 222 | 9.1.4  | Requirement for Insulin                                         | 41 |
| 223 | 9.2    | Formulation, packaging, and handling                            | 41 |
| 224 | 9.3    | Storage of study treatments(s)                                  | 41 |
| 225 | 9.4    | Accountability of the study treatment(s)                        | 41 |
| 226 | 9.5    | Assessment of compliance                                        | 42 |
| 227 | 9.5.1  | Missed Dose                                                     | 42 |
| 228 | 9.6    | Overdose of study treatment                                     | 42 |
| 229 | 9.7    | Prior and concomitant therapy                                   | 42 |
| 230 | 9.7.1  | Permitted Medications/Non- Investigational Medicinal Products   | 43 |
| 231 | 9.7.2  | Prohibited Medications                                          | 43 |
| 232 | 9.7.3  | Cautionary Medications                                          | 44 |
| 233 | 10.    | SAFETY REPORTING                                                | 44 |
| 234 | 10.1   | Definitions                                                     | 44 |
| 235 | 10.1.1 | Adverse event (AE)                                              | 44 |
| 236 | 10.1.2 | Adverse reaction (AR)                                           | 45 |
| 237 | 10.1.3 | Serious adverse event (SAE)                                     | 45 |
| 238 | 10.1.4 | Severe adverse events                                           | 45 |
| 239 | 10.1.5 | Suspected unexpected serious adverse reactions                  | 45 |
| 240 | 10.2   | Evaluations of AEs and SAEs                                     | 45 |
| 241 | 10.2.1 | Assessment of seriousness                                       | 50 |
| 242 | 10.2.2 | Assessment of causality                                         | 50 |
| 243 | 10.2.3 | Assessment of severity                                          | 50 |
| 244 | 10.2.4 | Assessment of expectedness                                      | 51 |
| 245 | 10.3   | Reporting Responsibilities of the investigator                  | 51 |
| 246 | 10.3.1 | Adverse Events/Serious Adverse Events                           | 51 |
| 247 | 10.3.2 | Timelines for reporting                                         | 51 |
| 248 | 10.3.3 | Safety Reporting for Non-IMP                                    | 52 |
| 249 | 10.4   | Reporting responsibilities of the sponsor                       | 52 |
| 250 | 10.4.1 | Regulatory Authorities                                          | 52 |
| 251 | 10.4.2 | Safety Reports                                                  | 52 |
| 252 | 10.4.3 | Annual Reports                                                  | 52 |
| 253 | 10.4.4 | Safety reports for non-IMP                                      | 53 |
| 254 | 10.5   | Data safety monitoring board (DSMB)                             | 53 |
| 255 | 10.6   | Trial Steering and Advisory Group                               | 53 |
| 256 | 11.    | STATISTICS                                                      | 53 |
| 257 | 11.1   | General Considerations                                          | 53 |
| 258 | 11.2   | Determination of sample size                                    | 54 |
| 259 | 11.3   | Analysis Sets                                                   | 54 |
| 260 | 11.3.1 | Intention-to-Treat Analysis Set                                 | 54 |
| 261 | 11.3.2 | Safety Analysis Set                                             | 54 |
| 262 | 11.4   | Demographic and baseline disease characteristics                | 54 |
| 263 | 11.5   | Effectiveness Analysis                                          | 55 |
| 264 | 11.5.1 | Primary Effectiveness Outcomes                                  | 55 |
| 265 | 11.5.2 | Secondary Effectiveness Outcomes                                | 55 |
| 266 | 11.5.3 | Health Economic Outcomes                                        | 55 |

|     |      |                                                                |    |
|-----|------|----------------------------------------------------------------|----|
| 267 | 11.6 | The level of statistical significance                          | 55 |
| 268 | 11.7 | Procedure for accounting for missing, unused and spurious data | 55 |
| 269 | 11.8 | Health economic analysis                                       | 56 |
| 270 | 12.  | DIRECT ACCESS TO SOURCE DATA/DOCUMENTS                         | 56 |
| 271 | 13.  | DATA HANDLING AND RECORD KEEPING                               | 57 |
| 272 | 13.1 | Data collection, source documents and case report forms (CRF): | 57 |
| 273 | 13.2 | Data reporting                                                 | 57 |
| 274 | 14.  | RETENTION OF ESSENTIAL DOCUMENTS                               | 57 |
| 275 | 15.  | REGULATIONS, ETHICS, COMPLIANCE AND GOVERNANCE                 | 58 |
| 276 | 15.1 | Sponsorship                                                    | 58 |
| 277 | 15.2 | Indemnity                                                      | 58 |
| 278 | 15.3 | Finance                                                        | 58 |
| 279 | 15.4 | Regulatory and Ethical Approvals                               | 58 |
| 280 | 15.5 | Audits and Inspections                                         | 58 |
| 281 | 15.6 | Ethical Considerations                                         | 58 |
| 282 | 15.7 | Protocol Compliance                                            | 59 |
| 283 | 15.8 | Patient Confidentiality                                        | 59 |
| 284 | 15.9 | Good Clinical Practice                                         | 59 |
| 285 | 16.  | AUDITS AND INSPECTIONS                                         | 59 |
| 286 | 17.  | ETHICS                                                         | 59 |
| 287 | 17.1 | Approvals                                                      | 59 |
| 288 | 17.2 | Benefits and risks assessment                                  | 60 |
| 289 | 17.3 | Participant confidentiality                                    | 60 |
| 290 | 18.  | CLINICAL STUDY REPORT AND PUBLICATION POLICY                   | 60 |
| 291 | 19.  | REFERENCES                                                     | 61 |
| 292 |      |                                                                |    |
| 293 |      |                                                                |    |

294  
295  
296

**3. DOCUMENT HISTORY**

| Document Version | Date of Issue                   | Summary of Change                                                                                                                                                                                                                                                                                                                                                                                                                                                                                                                                                                                                                                                                                                                                                                                                                                                                                                                                                                                                                                                                                                                                                                                         |
|------------------|---------------------------------|-----------------------------------------------------------------------------------------------------------------------------------------------------------------------------------------------------------------------------------------------------------------------------------------------------------------------------------------------------------------------------------------------------------------------------------------------------------------------------------------------------------------------------------------------------------------------------------------------------------------------------------------------------------------------------------------------------------------------------------------------------------------------------------------------------------------------------------------------------------------------------------------------------------------------------------------------------------------------------------------------------------------------------------------------------------------------------------------------------------------------------------------------------------------------------------------------------------|
| 1.0              | 5 <sup>th</sup> August 2016     | Original version                                                                                                                                                                                                                                                                                                                                                                                                                                                                                                                                                                                                                                                                                                                                                                                                                                                                                                                                                                                                                                                                                                                                                                                          |
| 2.0              | 23 <sup>rd</sup> September 2016 | Update to inclusion criteria and exclusion criteria.                                                                                                                                                                                                                                                                                                                                                                                                                                                                                                                                                                                                                                                                                                                                                                                                                                                                                                                                                                                                                                                                                                                                                      |
| 3.0              | 29 <sup>th</sup> September 2016 | <ul style="list-style-type: none"> <li>• Update to Section 9.2.1. Exceptions from AE/SAE reporting</li> <li>• Updates to sections 7.3.1 and 7.4.4. have been made to reflect the previous changes to the exclusion/exclusion criteria made in the version 2 protocol</li> <li>• The MA holder has been updated in section 8.2. to Merck Santé</li> <li>• Section 8.2. has been updated to include bottle sizes of 170 tablets</li> <li>• Typographical Corrections</li> </ul>                                                                                                                                                                                                                                                                                                                                                                                                                                                                                                                                                                                                                                                                                                                             |
| 4.0              | 22 <sup>nd</sup> August 2017    | <ul style="list-style-type: none"> <li>• Update to section 6.2. Rational for the Study, with reference to changes in inclusion criteria and typographical error in primary outcome timepoint.</li> <li>• Update to wording in section 7.1. Primary Objective</li> <li>• Timepoints of assessments have been removed in section 7.2. Secondary Objectives</li> <li>• Clarification provided on primary outcome measure section 7.3.1.</li> <li>• Update to section 8.1.3. Usual Care to include a trained delegate</li> <li>• Update to 8.2. Selection of Study Population, inclusion and exclusion criteria</li> <li>• Update to 8.3.1. to reflect changes in inclusion criteria.</li> <li>• Timepoints for study drug accountability, bio-banking, laboratory tests, updated in section 8.3.2. Prenatal Visits and Procedures. Study visit windows also removed.</li> <li>• Update to Figure 2 Schedule of Events to reflect changes in timepoints in section 8.3.2.</li> <li>• Section 8.3.4. 4 weeks post-partum visit updated to Visit 1 post-partum with updates to figure 2</li> <li>• Section 8.3.5. 12 weeks post-partum visit with updates to figure 2 updated to Visit 2 post-partum</li> </ul> |



|     |                                |                                                                                                                                                                                                                                                                                                                                                                                                                                                                                                                                                                                                                                                                                                                                                                                                                                                                                                                                                                                                                                                                                                                                                                                                                                                                                                                                                                                                                                                                                                                                                                                                                                                                                                                                                                            |
|-----|--------------------------------|----------------------------------------------------------------------------------------------------------------------------------------------------------------------------------------------------------------------------------------------------------------------------------------------------------------------------------------------------------------------------------------------------------------------------------------------------------------------------------------------------------------------------------------------------------------------------------------------------------------------------------------------------------------------------------------------------------------------------------------------------------------------------------------------------------------------------------------------------------------------------------------------------------------------------------------------------------------------------------------------------------------------------------------------------------------------------------------------------------------------------------------------------------------------------------------------------------------------------------------------------------------------------------------------------------------------------------------------------------------------------------------------------------------------------------------------------------------------------------------------------------------------------------------------------------------------------------------------------------------------------------------------------------------------------------------------------------------------------------------------------------------------------|
|     |                                | <ul style="list-style-type: none"> <li>• Section 8.4.1. updated to reflect changes in biobanking timepoints.</li> <li>• Updates to section 8.4.5. Laboratory Tests</li> <li>• Update to 8.4.6. Biobanking, to include a maternal biobanking sample at Visit 7 (week 12)</li> <li>• Type of glucometer used and quantity of data downloaded, and use of data updated in section 8.4.7. Glucometer Data.</li> <li>• Timepoints for study drug accountability updated in section 8.4.8. Study Drug Accountability</li> <li>• Update to 9.1.1. Usualcare to include a trained delegate.</li> <li>• Storage temperature updated in section 9.3. Storage of Study Treatment(s) to below 30°C</li> <li>• Medication supplied by the contracted packaging provider updated in section 9.4. Accountability of Study Treatments</li> <li>• Section 9.5. Assessment of Compliance updated to reflect change in timepoints for study drug accountability.</li> <li>• Update to section 9.7. Prior and Concomitant Therapy to include exceptions from con med recording.</li> <li>• Updates to Section 9.7.3. Cautionary medications</li> <li>• Update to section 10.2.1 Exceptions from SAE reporting.</li> <li>• Email address to report SAE's to the sponsor removed in section 10.3.1 Adverse Events/Serious Adverse Events as reporting will be via the eCRF.</li> <li>• Section 11.6 Level of Statistical Significance updated to include 95% confidence Intervals</li> <li>• Section 15.2 Indemity updated to include information from section 18. Section 18 removed.</li> <li>• Update to 15.7. Protocol Compliance</li> <li>• Removal of sections 17.1 and 17.2 as the information was contained within section 15</li> <li>• Typographical Corrections throughout</li> </ul> |
| 5.0 | 27 <sup>th</sup> November 2017 | <ul style="list-style-type: none"> <li>• Update to Table of contents page 10</li> <li>• Typographical corrections in section 4.0 "Synopsis" and section 8.4.6 "Biobanking".</li> <li>• Updates to figure 1 to include addition of box for baby procedures at 4 week post partum visit and 12 week post partum visit to align with text in section 8.3.4. "Phone Visit (Visit 1 Post-Partum)" and section 8.3.5</li> </ul>                                                                                                                                                                                                                                                                                                                                                                                                                                                                                                                                                                                                                                                                                                                                                                                                                                                                                                                                                                                                                                                                                                                                                                                                                                                                                                                                                  |

|     |              |                                                                                                                                                                                                                                                                                                                                                                                                                                                                                                                                                                                                                                                                                                                                                                                                                                                                                                                                                                                                                                                                                                                                                                                                                                                             |
|-----|--------------|-------------------------------------------------------------------------------------------------------------------------------------------------------------------------------------------------------------------------------------------------------------------------------------------------------------------------------------------------------------------------------------------------------------------------------------------------------------------------------------------------------------------------------------------------------------------------------------------------------------------------------------------------------------------------------------------------------------------------------------------------------------------------------------------------------------------------------------------------------------------------------------------------------------------------------------------------------------------------------------------------------------------------------------------------------------------------------------------------------------------------------------------------------------------------------------------------------------------------------------------------------------|
|     |              | <p>“12 Week Post-Partum Visit (Visit 2 Post-Partum)”.</p> <ul style="list-style-type: none"> <li>• Updates to section 8.3.3. Delivery Visit include removal of height, weight and BMI measurements at the delivery visit</li> <li>• Update to figure 2 include:             <ul style="list-style-type: none"> <li>a) Addition of text “weeks post randomisation”</li> <li>b) Addition of status of baby and neonatal measurements at 12 week post partum visit to align with text in section 8.3.5 “12 Week Postpartum Visit”</li> </ul> </li> <li>• Updates to section 8.4.5. Laboratory Tests include:             <ul style="list-style-type: none"> <li>a) Addition of visit window for 12 week post partum visit “+/- 4 weeks”.</li> <li>b) addition of urea, creatine, alanine aminotransferase (ALT), and aspartate transaminase (AST) at the randomisation visit as per the requirements of protocol version 3.0.</li> </ul> </li> <li>• Update to section 8.4.7 “Glucometer Data” to clarify data will be reviewed at each “on-site” visit.</li> <li>• Update to section 8.4.9. Neonatal Measurements to include ‘weight’</li> <li>• Update to section 15.1. “Sponsorship” to change “Principal Investigator” to “Chief Investigator”.</li> </ul> |
| 6.0 | 02-May- 2019 | <ul style="list-style-type: none"> <li>• Update to Table of contents page 5 and to the footer throughout the protocol</li> <li>• Updates to formatting and spacing have been made throughout the protocol</li> <li>• The abbreviation of GDPR has been added to the list of abbreviations in section 5</li> <li>• Update to sections 4 “synopsis” and section 8.2.3. “exclusion criteria” ,and to all further references made throughout the protocol to study exclusion criteria: “Known foetal anomaly” which was the previous exclusion criteria has since been updated to “major congenital malformations or an abnormality deemed unsuitable for metformin by the site PI or attending consultant” to define congenital anomalies which are a study exclusion criteria</li> <li>• Update to sections 4 “synopsis”, sections 8.1.2 and 8.3.4 and to all further references made throughout the protocol to the 4 week</li> </ul>                                                                                                                                                                                                                                                                                                                        |

|  |  |                                                                                                                                                                                                                                                                                                                                                                                                                                                                                                                                                                                                                                                                                                                                                                                                                                                                                                                                                                                                                                                                                                                                                                                                                                                                                                                                                                                                                                                                                                                                                                                                                                                                                                                                                                                                                                                                                                                                                                                                                     |
|--|--|---------------------------------------------------------------------------------------------------------------------------------------------------------------------------------------------------------------------------------------------------------------------------------------------------------------------------------------------------------------------------------------------------------------------------------------------------------------------------------------------------------------------------------------------------------------------------------------------------------------------------------------------------------------------------------------------------------------------------------------------------------------------------------------------------------------------------------------------------------------------------------------------------------------------------------------------------------------------------------------------------------------------------------------------------------------------------------------------------------------------------------------------------------------------------------------------------------------------------------------------------------------------------------------------------------------------------------------------------------------------------------------------------------------------------------------------------------------------------------------------------------------------------------------------------------------------------------------------------------------------------------------------------------------------------------------------------------------------------------------------------------------------------------------------------------------------------------------------------------------------------------------------------------------------------------------------------------------------------------------------------------------------|
|  |  | <p>post partum visit:<br/>The visit window for the 4 week post partum visit has since been updated from +/- 5 days to +/- 7 days.</p> <ul style="list-style-type: none"> <li>• Update made to section 4 "Synopsis" to remove reference to Cork University Hospital as a trial site. Portiuncula University Hospital and Mayo University Hospital have since been added to this section.</li> <li>• The words "subject" and "women" used throughout the protocol when referring to trial participants has since been replaced to simply "participant".</li> <li>• Definition of "Neonatal hypoglycaemia" has been expanded in section 7.3.2</li> <li>• Section 8.1 "Design Summary" has been updated to clarify that participants are followed up until 12 weeks post partum (+/- 4 weeks). The reference to the number of trial sites has since been updated to state that the trial will take place in upto 3 trial sites.</li> <li>• Section 8.1.2 "Placebo Group" has been updated to include the visit windows for the 4 week and the 12 week post partum study visits.</li> <li>• Updates to figure 1 include:             <ul style="list-style-type: none"> <li>○ "Usual care received" to be obtained at randomisation and the week 4 visit has been added</li> <li>○ "EQ5D-5L" and "medical resources" to be obtained at the randomisation visit has been added</li> <li>○ Return of study drug every 4 weeks has been added</li> <li>○ "Physical measurements" and "vital signs" have since been moved from the "2 weekly post randomisation" box to the box containing additional procedures to be undertaken during the prenatal treatment study phase, as per the protocol update</li> <li>○ The maternal bio-banking sample at randomisation and week 12 post randomisation has been removed from figure 1, as this substudy has been removed from the main protocol</li> <li>○ "Adverse events" has been added to the 4 week and 12 week post partum visits scheduled for the</li> </ul> </li> </ul> |
|--|--|---------------------------------------------------------------------------------------------------------------------------------------------------------------------------------------------------------------------------------------------------------------------------------------------------------------------------------------------------------------------------------------------------------------------------------------------------------------------------------------------------------------------------------------------------------------------------------------------------------------------------------------------------------------------------------------------------------------------------------------------------------------------------------------------------------------------------------------------------------------------------------------------------------------------------------------------------------------------------------------------------------------------------------------------------------------------------------------------------------------------------------------------------------------------------------------------------------------------------------------------------------------------------------------------------------------------------------------------------------------------------------------------------------------------------------------------------------------------------------------------------------------------------------------------------------------------------------------------------------------------------------------------------------------------------------------------------------------------------------------------------------------------------------------------------------------------------------------------------------------------------------------------------------------------------------------------------------------------------------------------------------------------|

|  |  |                                                                                                                                                                                                                                                                                                                                                                                                                                                                                                                                                                                                                                                                                                                                                                                                                                                                                                                                                                                                                                                                                                                                                                                                                                                                                                                                                                                                                                                                                                                                                                                                                                                                                                                                                                                                                                                                                                                                          |
|--|--|------------------------------------------------------------------------------------------------------------------------------------------------------------------------------------------------------------------------------------------------------------------------------------------------------------------------------------------------------------------------------------------------------------------------------------------------------------------------------------------------------------------------------------------------------------------------------------------------------------------------------------------------------------------------------------------------------------------------------------------------------------------------------------------------------------------------------------------------------------------------------------------------------------------------------------------------------------------------------------------------------------------------------------------------------------------------------------------------------------------------------------------------------------------------------------------------------------------------------------------------------------------------------------------------------------------------------------------------------------------------------------------------------------------------------------------------------------------------------------------------------------------------------------------------------------------------------------------------------------------------------------------------------------------------------------------------------------------------------------------------------------------------------------------------------------------------------------------------------------------------------------------------------------------------------------------|
|  |  | <p>mother, as per the schedule of visits and procedures. “Adverse events” has also been added to the delivery, 4 week and 12 week post partum visits for the baby.</p> <ul style="list-style-type: none"> <li>○ Addition of statement of “in person visits only” when referring to glucometer data download during the 2 weekly post randomisation study visits.</li> <li>○ Addition of “last routine HbA1c” and “gastrointestinal events” to the box outlining the study procedures at the fortnightly post randomisation study visits</li> <li>○ Removal of “laboratory samples” from the box containing the delivery procedures for the mother, which were removed in protocol version 4.0</li> <li>○ Removal of “cord blood bio-banking” from the box outlining the study procedures for the baby at the delivery visit, as this has been removed from the main study protocol</li> <li>○ Removal of “height and weight” from the box outlining the study procedures for the baby at the 12 week post-partum study visit</li> <li>○ “Vital signs” has been added to the box outlining the schedule of events at the 12 week post partum visit in the mother, as per the the protocol</li> </ul> <ul style="list-style-type: none"> <li>● Updates have been made to section 8.3.1 “Screening and Randomisation Visit and Procedures”. The previous sentence of “all con meds including herbal and vitamin supplements” has been removed when referring to the review of concomitant medications during this visit. The bio-banking component of the study has since been removed from the main study protocol into a sub-study protocol, which is acknowledged in the amended text.</li> <li>● Updates made to section 8.3.2 “prenatal visit and procedures”. Removed the requirement to obtain physical measurements and vital signs every 2 weeks, and instead specified these measurements are to be obtained at the 32</li> </ul> |
|--|--|------------------------------------------------------------------------------------------------------------------------------------------------------------------------------------------------------------------------------------------------------------------------------------------------------------------------------------------------------------------------------------------------------------------------------------------------------------------------------------------------------------------------------------------------------------------------------------------------------------------------------------------------------------------------------------------------------------------------------------------------------------------------------------------------------------------------------------------------------------------------------------------------------------------------------------------------------------------------------------------------------------------------------------------------------------------------------------------------------------------------------------------------------------------------------------------------------------------------------------------------------------------------------------------------------------------------------------------------------------------------------------------------------------------------------------------------------------------------------------------------------------------------------------------------------------------------------------------------------------------------------------------------------------------------------------------------------------------------------------------------------------------------------------------------------------------------------------------------------------------------------------------------------------------------------------------|

|  |  |                                                                                                                                                                                                                                                                                                                                                                                                                                                                                                                                                                                                                                                                                                                                                                                                                                                                                                                                                                                                                                                                                                                                                                                                                                                                                                                                                                                                                                                                                                                                                                                                                                                                                                                                                                                                                                                                                                                                                                                                                                      |
|--|--|--------------------------------------------------------------------------------------------------------------------------------------------------------------------------------------------------------------------------------------------------------------------------------------------------------------------------------------------------------------------------------------------------------------------------------------------------------------------------------------------------------------------------------------------------------------------------------------------------------------------------------------------------------------------------------------------------------------------------------------------------------------------------------------------------------------------------------------------------------------------------------------------------------------------------------------------------------------------------------------------------------------------------------------------------------------------------------------------------------------------------------------------------------------------------------------------------------------------------------------------------------------------------------------------------------------------------------------------------------------------------------------------------------------------------------------------------------------------------------------------------------------------------------------------------------------------------------------------------------------------------------------------------------------------------------------------------------------------------------------------------------------------------------------------------------------------------------------------------------------------------------------------------------------------------------------------------------------------------------------------------------------------------------------|
|  |  | <p>week (+/- 1 week) and 38 week (+/- 1 week) gestation visits. Removed the requirement to obtain the maternal blood sample for bio-banking at gestational week 38 (+/- 1 week). A sentence was also added to the “glucometer data download” procedure, to acknowledge that this applies for in person visits only. Sentence was added to state “visits that do not require an in person physical measurement, laboratory assessment or drug dispensation can be completed over the telephone”.</p> <ul style="list-style-type: none"> <li>• A sentence has been added to bullet point number 3 “adverse events” in section 8.3.3 “Delivery visit” to clarify that adverse events are to be collected for both the mother and baby</li> <li>• The collection of “adverse events” in both the mother and baby for the schedule of procedures at the week 4 and the week 12 post partum visits have been added to sections 8.3.4 and section 8.3.5, as per the protocol</li> <li>• Removed requirement to collect “height and weight of baby” from section 8.3.5 “12 week Post-Partum Visit”.</li> <li>• Updates to Figure 2 include:             <ul style="list-style-type: none"> <li>○ New column for “additional Visit(s)” which may occur pre-natally has been added</li> <li>○ Additional superscripts have been added to certain procedures, which has updated previous letters as a result. These additional superscripts were added to clarify further when procedures are required. Additional footnotes have been added at the end of figure 2 as a result.</li> <li>○ Reference to obtain neonatal measurements at the 12 week post partum visit has been removed</li> <li>○ The figure has been updated to account for the return of study drug every 4 weeks during pre-natal study visits</li> <li>○ The bio-banking sample which was previously listed as a study procedure at the week 12 post randomisation visit has been removed, as this substudy is being removed from the main protocol</li> </ul> </li> </ul> |
|--|--|--------------------------------------------------------------------------------------------------------------------------------------------------------------------------------------------------------------------------------------------------------------------------------------------------------------------------------------------------------------------------------------------------------------------------------------------------------------------------------------------------------------------------------------------------------------------------------------------------------------------------------------------------------------------------------------------------------------------------------------------------------------------------------------------------------------------------------------------------------------------------------------------------------------------------------------------------------------------------------------------------------------------------------------------------------------------------------------------------------------------------------------------------------------------------------------------------------------------------------------------------------------------------------------------------------------------------------------------------------------------------------------------------------------------------------------------------------------------------------------------------------------------------------------------------------------------------------------------------------------------------------------------------------------------------------------------------------------------------------------------------------------------------------------------------------------------------------------------------------------------------------------------------------------------------------------------------------------------------------------------------------------------------------------|

|  |  |                                                                                                                                                                                                                                                                                                                                                                                                                                                                                                                                                                                                                                                                                                                                                                                                                                                                                                                                                                                                                                                                                                                                                                                                                                                                                                                                                                                                                                                                                                                                                                                                                                                                                                                                                                                                                                                                                                                                                                                                                                                                                                                                                   |
|--|--|---------------------------------------------------------------------------------------------------------------------------------------------------------------------------------------------------------------------------------------------------------------------------------------------------------------------------------------------------------------------------------------------------------------------------------------------------------------------------------------------------------------------------------------------------------------------------------------------------------------------------------------------------------------------------------------------------------------------------------------------------------------------------------------------------------------------------------------------------------------------------------------------------------------------------------------------------------------------------------------------------------------------------------------------------------------------------------------------------------------------------------------------------------------------------------------------------------------------------------------------------------------------------------------------------------------------------------------------------------------------------------------------------------------------------------------------------------------------------------------------------------------------------------------------------------------------------------------------------------------------------------------------------------------------------------------------------------------------------------------------------------------------------------------------------------------------------------------------------------------------------------------------------------------------------------------------------------------------------------------------------------------------------------------------------------------------------------------------------------------------------------------------------|
|  |  | <ul style="list-style-type: none"> <li>○ “Adverse Events” has been added to the list of neonatal procedures at the delivery, 4 week post partum and 12 week post partum visits for clarity</li> <li>• The reference to obtaining additional consent for the maternal biobanking samples and the cord blood samples in section 8.4.1 “Informed consent” has been removed, as this will no longer form part of the main protocol study procedures</li> <li>• Section 8.4.2 “Medical history” has been updated to clarify the relevant required medical conditions to be documented at the screening visit</li> <li>• Section 8.4.5 “laboratory tests” has been updated. The word “fasting” has been removed from both the insulin and c-peptide laboratory assessments performed at the randomisation visit, as these particular assessments do not require the participant to be fasting.</li> <li>• Section 8.4.6 “Bio-banking” has been updated to remove the bio-banking component of the study from the main study protocol. Participants at all trial sites will be invited to partake in the bio-banking sub-study preapproved by the research ethics committee, as guided by local practice patterns and the availability of resources (including staff). All further references made to the collection of cord-blood biobanking samples at delivery and the maternal bio-banking samples at randomisation and week 12 post randomisation throughout the protocol have been revised accordingly.</li> <li>• Section 8.4.7 “glucometer data” has been updated to acknowledge that glucometer data will be downloaded at a subsequent in person study visit</li> <li>• Section 8.4.8 “study drug accountability” has been updated to revise the sentence “participants will be deemed compliant if they have taken 80% of study medication, i.e. 80% of the maximum tolerated dose” to ‘Non-compliance is defined as less than 80% drug adherence of the participants maximum tolerated dose’.</li> <li>• Section 8.4.9 “Neonatal Measurements” has been updated to include the sentence “where available, abdominal circumference</li> </ul> |
|--|--|---------------------------------------------------------------------------------------------------------------------------------------------------------------------------------------------------------------------------------------------------------------------------------------------------------------------------------------------------------------------------------------------------------------------------------------------------------------------------------------------------------------------------------------------------------------------------------------------------------------------------------------------------------------------------------------------------------------------------------------------------------------------------------------------------------------------------------------------------------------------------------------------------------------------------------------------------------------------------------------------------------------------------------------------------------------------------------------------------------------------------------------------------------------------------------------------------------------------------------------------------------------------------------------------------------------------------------------------------------------------------------------------------------------------------------------------------------------------------------------------------------------------------------------------------------------------------------------------------------------------------------------------------------------------------------------------------------------------------------------------------------------------------------------------------------------------------------------------------------------------------------------------------------------------------------------------------------------------------------------------------------------------------------------------------------------------------------------------------------------------------------------------------|

|  |  |                                                                                                                                                                                                                                                                                                                                                                                                                                                                                                                                                                                                                                                                                                                                                                                                                                                                                                                                                                                                                                                                                                                                                                                                                                                                                                                                                                                                                                                                                                                                                                                                                                                                                                                                                                                                                                                                                                                                                                                                                                                                                                                         |
|--|--|-------------------------------------------------------------------------------------------------------------------------------------------------------------------------------------------------------------------------------------------------------------------------------------------------------------------------------------------------------------------------------------------------------------------------------------------------------------------------------------------------------------------------------------------------------------------------------------------------------------------------------------------------------------------------------------------------------------------------------------------------------------------------------------------------------------------------------------------------------------------------------------------------------------------------------------------------------------------------------------------------------------------------------------------------------------------------------------------------------------------------------------------------------------------------------------------------------------------------------------------------------------------------------------------------------------------------------------------------------------------------------------------------------------------------------------------------------------------------------------------------------------------------------------------------------------------------------------------------------------------------------------------------------------------------------------------------------------------------------------------------------------------------------------------------------------------------------------------------------------------------------------------------------------------------------------------------------------------------------------------------------------------------------------------------------------------------------------------------------------------------|
|  |  | <p>and mid-upper arm circumference will be taken”</p> <ul style="list-style-type: none"> <li>• Section 8.8 “Discontinuation/withdrawal of participant from study treatment” has been amended to clarify the difference between a participant discontinuing study medication, and a participant withdrawing study consent</li> <li>• Sections 9.3 and 9.4 have been updated to remove the previous references to storage of treatment in locked cabinets at the research pharmacy. The reference to the supply of study medication by the contracted packaging provider in section 9.4 has been updated to state that study medication will be supplied to the site as per the sponsor supply process. The reference to the “research nurse” in section 9.4 has been changed to “research delegate”</li> <li>• The list of exempted concomitant medications in section 9.7 “prior and concomitant therapy” has been updated to remove the exemptions d) betamethasone 12mg for foetal lung maturation and e) magnesium sulphate, which were listed in protocol version 5.0. New expected concomitant medications have since been added to the list. These include: (f) routine vaccines in the baby (BCG/TB, Diphtheria, Tetanus, Pertussis, Haemophilus Influenza B (Hib), Polio, Hep B, Pneumococcal (PCV), Meningococcal (Men B) (g) maternal vaccinations, (h) Vitamin K administration (baby only), (i) Anti D for mother, (j) Over-the-counter antenatal multivitamins</li> <li>• Additional clarification and definitions in relation to safety have been added to sections 10.1.1 and 10.1.3</li> <li>• Additional safety event exemptions have been added to section 10.2 “Evaluation of AEs and SAEs”.</li> <li>• Figure 3 has been introduced to section 10.2 “Evaluation of AEs and SAEs”</li> <li>• Additional clarification has been added to section 10.3.2 to clarify site awareness and what is considered a valid SAE report</li> <li>• Section 10.4.1. has been updated to amend the information in relation to regulatory authorities</li> <li>• An additional sentence has been added to</li> </ul> |
|--|--|-------------------------------------------------------------------------------------------------------------------------------------------------------------------------------------------------------------------------------------------------------------------------------------------------------------------------------------------------------------------------------------------------------------------------------------------------------------------------------------------------------------------------------------------------------------------------------------------------------------------------------------------------------------------------------------------------------------------------------------------------------------------------------------------------------------------------------------------------------------------------------------------------------------------------------------------------------------------------------------------------------------------------------------------------------------------------------------------------------------------------------------------------------------------------------------------------------------------------------------------------------------------------------------------------------------------------------------------------------------------------------------------------------------------------------------------------------------------------------------------------------------------------------------------------------------------------------------------------------------------------------------------------------------------------------------------------------------------------------------------------------------------------------------------------------------------------------------------------------------------------------------------------------------------------------------------------------------------------------------------------------------------------------------------------------------------------------------------------------------------------|

|  |  |                                                                                                                                                                                                                                                                                                                                                                                                                                                                                                                                                                                                                                                                                                                                       |
|--|--|---------------------------------------------------------------------------------------------------------------------------------------------------------------------------------------------------------------------------------------------------------------------------------------------------------------------------------------------------------------------------------------------------------------------------------------------------------------------------------------------------------------------------------------------------------------------------------------------------------------------------------------------------------------------------------------------------------------------------------------|
|  |  | <p>section 10.4.4 in relation to the safety reporting for the non-IMP</p> <ul style="list-style-type: none"> <li>• Section 11.2 “Determination of sample size” has been revised to include relevant information from Portiuncula and Mayo University Hospitals</li> <li>• Section 14 “Retention of essential documents” has been revised to clarify the storage of the trial master file and the investigator site files.</li> <li>• Section 15.7 “Protocol compliance” has been updated to remove references to the previous study procedure for reporting protocol deviations</li> <li>• Section 17.3 “Participant Confidentiality” has been updated to include reference to the General Data Protection Regulation 2018</li> </ul> |
|--|--|---------------------------------------------------------------------------------------------------------------------------------------------------------------------------------------------------------------------------------------------------------------------------------------------------------------------------------------------------------------------------------------------------------------------------------------------------------------------------------------------------------------------------------------------------------------------------------------------------------------------------------------------------------------------------------------------------------------------------------------|

297  
298  
299  
300  
301  
302  
303  
304  
305  
306  
307  
308  
309  
310  
311  
312

**4. SYNOPSIS**

|                      |                                                                                                                                                                                                                                                                                |
|----------------------|--------------------------------------------------------------------------------------------------------------------------------------------------------------------------------------------------------------------------------------------------------------------------------|
| Title of study       | A randomised placebo controlled trial of the effectiveness of Early METformin in addition to usual care in the Reduction of Gestational diabetes mellitus Effects (EMERGE)                                                                                                     |
| Name of sponsor      | Prof. Lokesh Joshi<br>(Vice President of Research)<br>National University of Ireland Galway,<br>University Road<br>Galway, Ireland                                                                                                                                             |
| Clinical Study Phase | III                                                                                                                                                                                                                                                                            |
| Objectives           | The overall objective of the EMERGE trial is to determine whether metformin + usual care, compared to placebo + usual care (introduced at the time of initial diagnosis of GDM), reduces a) the need for insulin use, or hyperglycemia (primary outcome measure); b) excessive |



|                           |                                                                                                                                                                                                                                                                                                                                                                                                                                                                                                                                                                                                                                                                                                                                                                                                                                                                                                                                                                                                                                                                                                                                                                                                                                                                                                                                                                                                                                                                                                                          |
|---------------------------|--------------------------------------------------------------------------------------------------------------------------------------------------------------------------------------------------------------------------------------------------------------------------------------------------------------------------------------------------------------------------------------------------------------------------------------------------------------------------------------------------------------------------------------------------------------------------------------------------------------------------------------------------------------------------------------------------------------------------------------------------------------------------------------------------------------------------------------------------------------------------------------------------------------------------------------------------------------------------------------------------------------------------------------------------------------------------------------------------------------------------------------------------------------------------------------------------------------------------------------------------------------------------------------------------------------------------------------------------------------------------------------------------------------------------------------------------------------------------------------------------------------------------|
|                           | <p>maternal weight gain; c) maternal and neonatal morbidities and, d) cost of treatment for participants with Gestational Diabetes Mellitus.</p> <p>Primary Objective:<br/>The primary objective is to determine if metformin reduces the requirement for insulin or the rate of fasting hyperglycaemia (<math>\geq 5.1</math> mmol/l) at gestational weeks 32 or 38.</p> <p>Secondary Objectives:</p> <ol style="list-style-type: none"> <li>1. To determine if metformin delays the initiation of insulin</li> <li>2. To determine if metformin reduces the insulin dose required (and dose/kg/week of gestation)</li> <li>3. To determine if metformin impacts on maternal body weight, BMI, waist circumference, blood glucose status, insulin resistance status and metabolic syndrome postpartum ;</li> <li>4. To determine if metformin reduces the proportion of infants with morbidities;</li> <li>5. To determine if metformin in addition to usual care reduces infant birth weight when compared to usual care alone</li> <li>6. To determine if metformin reduces the proportion of maternal morbidities when compared to usual care alone</li> <li>7. To determine if metformin in addition to usual care reduces excessive maternal gestational weight gain (GWG)</li> <li>8. To determine if participants consider metformin a more acceptable treatment than insulin</li> <li>9. To determine the cost, cost effectiveness, and budget impact of metformin in addition to usual care for GDM</li> </ol> |
| Test Drugs                | Metformin                                                                                                                                                                                                                                                                                                                                                                                                                                                                                                                                                                                                                                                                                                                                                                                                                                                                                                                                                                                                                                                                                                                                                                                                                                                                                                                                                                                                                                                                                                                |
| Name of Active Ingredient | Metformin                                                                                                                                                                                                                                                                                                                                                                                                                                                                                                                                                                                                                                                                                                                                                                                                                                                                                                                                                                                                                                                                                                                                                                                                                                                                                                                                                                                                                                                                                                                |
| Dose(s)                   | Dose will be titrated up, as tolerated, over a period of 10 days, from a starting dose of 500mg once daily to a maximum of 1.5g in the morning and 1g in the evening.                                                                                                                                                                                                                                                                                                                                                                                                                                                                                                                                                                                                                                                                                                                                                                                                                                                                                                                                                                                                                                                                                                                                                                                                                                                                                                                                                    |
| Route of administration   | Oral                                                                                                                                                                                                                                                                                                                                                                                                                                                                                                                                                                                                                                                                                                                                                                                                                                                                                                                                                                                                                                                                                                                                                                                                                                                                                                                                                                                                                                                                                                                     |
| Duration of treatment     | Until Delivery                                                                                                                                                                                                                                                                                                                                                                                                                                                                                                                                                                                                                                                                                                                                                                                                                                                                                                                                                                                                                                                                                                                                                                                                                                                                                                                                                                                                                                                                                                           |
| Reference Drugs           | Metformin placebo                                                                                                                                                                                                                                                                                                                                                                                                                                                                                                                                                                                                                                                                                                                                                                                                                                                                                                                                                                                                                                                                                                                                                                                                                                                                                                                                                                                                                                                                                                        |
| Name of Active Ingredient | Not applicable                                                                                                                                                                                                                                                                                                                                                                                                                                                                                                                                                                                                                                                                                                                                                                                                                                                                                                                                                                                                                                                                                                                                                                                                                                                                                                                                                                                                                                                                                                           |
| Dose(s)                   | Dose will be titrated up, as tolerated, over a period of 10 days, from a starting dose of 500mg once daily to a maximum of 1.5g in the morning and 1g in the evening.                                                                                                                                                                                                                                                                                                                                                                                                                                                                                                                                                                                                                                                                                                                                                                                                                                                                                                                                                                                                                                                                                                                                                                                                                                                                                                                                                    |
| Route of administration   | Oral                                                                                                                                                                                                                                                                                                                                                                                                                                                                                                                                                                                                                                                                                                                                                                                                                                                                                                                                                                                                                                                                                                                                                                                                                                                                                                                                                                                                                                                                                                                     |
| Duration of treatment     | Until Delivery                                                                                                                                                                                                                                                                                                                                                                                                                                                                                                                                                                                                                                                                                                                                                                                                                                                                                                                                                                                                                                                                                                                                                                                                                                                                                                                                                                                                                                                                                                           |
| Usual care                | Medical nutritional therapy and exercise advice provided by the Diabetes team or trained delegate                                                                                                                                                                                                                                                                                                                                                                                                                                                                                                                                                                                                                                                                                                                                                                                                                                                                                                                                                                                                                                                                                                                                                                                                                                                                                                                                                                                                                        |

|                    |                                                                                                                                                                                                                                                                                                                                                                                                                                                                                                                                                                                                                                                                                                                                                                                                                                                                                                                                                                                                                                                                                                                                                                                                                                                                                                                                                                                                                                                                                                                                                                                                                                                                                                                                                                                                                                                                                                                                                         |
|--------------------|---------------------------------------------------------------------------------------------------------------------------------------------------------------------------------------------------------------------------------------------------------------------------------------------------------------------------------------------------------------------------------------------------------------------------------------------------------------------------------------------------------------------------------------------------------------------------------------------------------------------------------------------------------------------------------------------------------------------------------------------------------------------------------------------------------------------------------------------------------------------------------------------------------------------------------------------------------------------------------------------------------------------------------------------------------------------------------------------------------------------------------------------------------------------------------------------------------------------------------------------------------------------------------------------------------------------------------------------------------------------------------------------------------------------------------------------------------------------------------------------------------------------------------------------------------------------------------------------------------------------------------------------------------------------------------------------------------------------------------------------------------------------------------------------------------------------------------------------------------------------------------------------------------------------------------------------------------|
| Indication         | Gestational Diabetes Mellitus                                                                                                                                                                                                                                                                                                                                                                                                                                                                                                                                                                                                                                                                                                                                                                                                                                                                                                                                                                                                                                                                                                                                                                                                                                                                                                                                                                                                                                                                                                                                                                                                                                                                                                                                                                                                                                                                                                                           |
| Trial design       | A phase III, parallel, randomised, double blind, placebo controlled trial                                                                                                                                                                                                                                                                                                                                                                                                                                                                                                                                                                                                                                                                                                                                                                                                                                                                                                                                                                                                                                                                                                                                                                                                                                                                                                                                                                                                                                                                                                                                                                                                                                                                                                                                                                                                                                                                               |
| Inclusion criteria | <ul style="list-style-type: none"> <li>a) Willing and able to provide written informed consent</li> <li>b) Participants aged 18-50</li> <li>c) Pregnancy gestation up to 28 weeks (+ 6 days) confirmed by positive pregnancy test</li> <li>d) Singleton pregnancy as determined by scan</li> <li>e) Positive diagnosis of Gestational Diabetes Mellitus on a OGTT according to IADPSG criteria if any one of the following are achieved: <ul style="list-style-type: none"> <li>i. Fasting glucose <math>\geq</math> 5.1mmol/l and <math>&lt;</math>7mmol/l, or</li> <li>ii. 1 hour post glucose load of <math>\geq</math>10mmol/l, or</li> <li>iii. 2 hour post glucose load of <math>\geq</math>8.5 mmol/l and <math>&lt;</math>11.1mmo/l</li> </ul> </li> <li>f) Resident in the locality and intending to deliver within the trial site</li> </ul>                                                                                                                                                                                                                                                                                                                                                                                                                                                                                                                                                                                                                                                                                                                                                                                                                                                                                                                                                                                                                                                                                                  |
| Exclusion criteria | <ul style="list-style-type: none"> <li>a) Participants who have an established diagnosis of diabetes (Type 1, Type 2, Monogenic or secondary)</li> <li>b) Participants with a fasting glucose <math>\geq</math> 7mmol/l or a 2h value <math>\geq</math> 11.1 mmol/l</li> <li>c) Multiple pregnancies (twins, triplets etc.) as determined by scan</li> <li>d) Known intolerance to metformin</li> <li>e) Known contraindication to the use of metformin which include: <ul style="list-style-type: none"> <li>i. renal insufficiency (defined as serum creatinine of greater than 130 <math>\mu</math>mol/L or creatinine clearance <math>&lt;</math>60 ml/min)</li> <li>ii. moderate to severe liver dysfunction (aspartate aminotransferase (AST) and alanine aminotransferase (ALT) greater than 3 times the upper limit of normal)</li> <li>iii. shock or sepsis, and</li> <li>iv. previous hypersensitivity to metformin</li> </ul> </li> <li>f) Major congenital malformations or an abnormality deemed unsuitable for metformin by the site PI or attending consultant</li> <li>g) Known small for gestational age<sup>1</sup></li> <li>h) Known current gestational hypertension or pre-eclampsia or ruptured membranes</li> <li>i) Participants who have a history of drug or alcohol use that, in the opinion of the investigator, would interfere with adherence to study requirements</li> <li>j) Participants with significant gastrointestinal problems such as severe vomiting, Crohn's disease or colitis which will inadvertently affect absorption of the study drug</li> <li>k) Participants with congestive heart failure or history of congestive heart failure</li> <li>l) Participants with serious mental illness which would affect adherence to study medication or compliance with study protocol in the opinion of the investigator</li> <li>m) Patients with rare hereditary problems of galactose intolerance,</li> </ul> |

|                          |                                                                                                                                                                                                                                                                                                                                                                                                                                                                                                                                                                                                                                                                                             |
|--------------------------|---------------------------------------------------------------------------------------------------------------------------------------------------------------------------------------------------------------------------------------------------------------------------------------------------------------------------------------------------------------------------------------------------------------------------------------------------------------------------------------------------------------------------------------------------------------------------------------------------------------------------------------------------------------------------------------------|
|                          | <p>the Lapp lactase deficiency or glucose-galactose malabsorption</p> <p><sup>1</sup>Small for gestational age (SGA) refers to fetal growth less than the 10th percentile (RCOG, 2014), or if foetal growth is deemed unsatisfactory by the treating obstetrician.</p>                                                                                                                                                                                                                                                                                                                                                                                                                      |
| Type of control          | Placebo                                                                                                                                                                                                                                                                                                                                                                                                                                                                                                                                                                                                                                                                                     |
| Number of participants   | 550 participants will be randomised across 3 sites (Galway University Hospital, Portiuncula University Hospital and Mayo University Hospital)                                                                                                                                                                                                                                                                                                                                                                                                                                                                                                                                               |
| Methodology              | <p>The study will comprise 3 periods; 1) screening, 2) treatment, and 3) follow up.</p> <p>During screening, informed consent will be obtained and evaluations of the participant's eligibility will be performed. At the beginning of the treatment period, participants will be randomised up to 28 weeks gestation (+ 6 days) in a 1:1 ratio, stratified by BMI and previous GDM to receive either metformin or matching placebo, in addition to usual care. The treatment period will be until delivery. Participants will be followed up at 4 weeks post-partum (+/- 7 days) by telephone, and 12 weeks postpartum (+/- 4 weeks) in the clinic for maternal and neonatal outcomes.</p> |
| Statistical methods      | <p>The primary analysis will be a comparison of the incidence of the composite primary outcome of proportion of participants needing insulin or fasting blood glucose <math>\geq 5.1</math> mmol/l at gestational weeks 32 or 38 between treatment and control arms, using an exact test for a binomial response. A secondary analysis will involve a comparison of the time to insulin initiation between the treatment groups, using the log-rank test and the proportional hazards model.</p>                                                                                                                                                                                            |
| Health Economic Analysis | <p>The health economic analysis will consist of trial-based economic evaluation and will incorporate both cost effectiveness analysis and cost utility analysis to compare the alternative treatment strategies: 1) metformin in addition to usual care for GDM and 2) usual care for GDM.</p>                                                                                                                                                                                                                                                                                                                                                                                              |

313

314

315

316

## 5. ABBREVIATIONS

317

318 ACOG American Congress of Obstetrics and Gynaecologists

319 ADA American Diabetes Association

320 AE Adverse event

321 ALT Alanine Aminotransferase

322 ANOVA Analysis of Variance

323 APH Antepartum haemorrhage

324 AR Adverse reaction

325 AST Aspartate Aminotransferase

326 b.i.d. Twice daily

327 BCSH British Committee for Standards in Haematology

328 BMI Body mass index

329 CDMS Clinical data management system

330 CI Confidence interval

331 CRF Case report form

332 CRFG Clinical Research Facility Galway

|     |        |                                                                          |
|-----|--------|--------------------------------------------------------------------------|
| 333 | CT     | Clinical trial                                                           |
| 334 | CTA    | Clinical trial authorisation                                             |
| 335 | DNS    | Diabetes Nurse Specialist                                                |
| 336 | DMF    | Data management file                                                     |
| 337 | DOB    | Date of birth                                                            |
| 338 | DTSQ   | Diabetes Treatment Satisfaction Questionnaire                            |
| 339 | DSMB   | Data safety and monitoring board                                         |
| 340 | DSUR   | Development safety update report                                         |
| 341 | EBCOG  | European Board and College of Obstetrics and Gynaecology                 |
| 342 | e-CRF  | Electronic case report form                                              |
| 343 | EDC    | Electronic data capture                                                  |
| 344 | EDTA   | Ethylenediaminetetraacetic acid                                          |
| 345 | EQ5D   | Euroqol Five Dimensions Measurement Tool                                 |
| 346 | eGFR   | Estimated glomerular filtration rate                                     |
| 347 | EU     | European Union                                                           |
| 348 | FBG    | Fasting blood glucose                                                    |
| 349 | FIGO   | Federation of International Gynaecological and Obstetric Societies       |
| 350 | GCP    | Good Clinical Practice                                                   |
| 351 | GDM    | Gestational Diabetes Mellitus                                            |
| 352 | GDPR   | General Data Protection Regulation                                       |
| 353 | GMP    | Good manufacturing practice                                              |
| 354 | GWG    | Gestational Weight Gain                                                  |
| 355 | GP     | General Practitioner                                                     |
| 356 | HbA1c  | Glycated haemoglobin                                                     |
| 357 | Hb     | Haemoglobin                                                              |
| 358 | HDL    | High density lipoprotein cholesterol                                     |
| 359 | HDPE   | High density polyethylene                                                |
| 360 | HEPA   | the Health Economic and Policy Analysis                                  |
| 361 | HIQA   | the Health information and Quality Authority                             |
| 362 | HPRA   | Health Products Regulatory Authority                                     |
| 363 | IB     | Investigators brochure                                                   |
| 364 | ICF    | Informed consent form                                                    |
| 365 | ICH    | International Conference on Harmonisation                                |
| 366 | IEC    | Independent Ethics Committee                                             |
| 367 | IFG    | Impaired fasting glucose                                                 |
| 368 | IOM    | Institute of Medicine                                                    |
| 369 | IUGR   | Intrauterine growth restriction                                          |
| 370 | IMP    | Investigational medicinal products                                       |
| 371 | IMPD   | Investigational medicinal product dossier                                |
| 372 | ISO    | International Organisation for Standardization                           |
| 373 | IADPSG | the International Association of the Diabetes and Pregnancy Study Groups |
| 374 | LDL    | Low density lipoprotein cholesterol                                      |
| 375 | LGA    | Large for gestational age                                                |
| 376 | MetS   | Metabolic Syndrome                                                       |
| 377 | Mmol/l | millimole per litre                                                      |
| 378 | ml/min | millilitre per minute                                                    |
| 379 | MNT    | Medical Nutritional Therapy                                              |
| 380 | NGT    | Normal Glucose Tolerance                                                 |
| 381 | NIMP   | Non-Investigational Medicinal Product                                    |
| 382 | NNU    | Neonatal unit                                                            |
| 383 | aOR    | adjusted odds ratio                                                      |
| 384 | OB     | Obese                                                                    |

---

|     |        |                                               |
|-----|--------|-----------------------------------------------|
| 385 | o.d.   | Once daily                                    |
| 386 | OGTT   | Oral glucose tolerance test                   |
| 387 | OR     | Odds ratio                                    |
| 388 | OW     | Overweight                                    |
| 389 | PCOS   | Polycystic ovarian syndrome                   |
| 390 | PET    | Preeclampsia                                  |
| 391 | PI     | Principal Investigator                        |
| 392 | PIH    | Pregnancy induced hypertension                |
| 393 | PIL    | Patient/participant information leaflet       |
| 394 | PPH    | Post-partum haemorrhage                       |
| 395 | RCT    | Randomised controlled trial                   |
| 396 | REC    | Research Ethics Committee                     |
| 397 | SAE    | Serious adverse event                         |
| 398 | SAR    | Serious adverse reaction                      |
| 399 | SmPC   | Summary of product characteristics            |
| 400 | SOP    | Standard operating procedure                  |
| 401 | SUSAR  | Suspected unexpected serious adverse reaction |
| 402 | TC     | Total cholesterol                             |
| 403 | Tg     | Triglycerides                                 |
| 404 | t.i.d. | Three times a day                             |
| 405 | TMF    | Trial master file                             |
| 406 | TSC    | Trial steering committee                      |
| 407 | QALY   | Quality-adjusted life years                   |
| 408 | q.i.d. | Four times a day                              |
| 409 | WHO    | World Health Organisation                     |
| 410 |        |                                               |

411 **6. INTRODUCTION**

412

413 **6.1. BACKGROUND INFORMATION**

414

415 **6.1.1. What is Gestational Diabetes Mellitus?**

416

417 Gestational Diabetes Mellitus (GDM) is defined by the World Health Organisation (WHO) as glucose  
418 intolerance resulting in hyperglycaemia during pregnancy (ADA 2004). There are a number of  
419 diagnostic criteria from National and International Organisations, which differ by the threshold of  
420 hyperglycaemia required to diagnose GDM, based on one of the following, i) fasting glucose, ii)  
421 random glucose and/or iii) oral glucose tolerance test OGTT. The IADPSG and WHO define GDM as  
422 fasting glucose  $\geq 5.1$ mmol/l or 1-hour glucose post-OGTT of  $\geq 10.0$ mmol/l or 2-hour glucose post-  
423 OGTT  $>= 8.5$ mmol/l. Other North American guidelines define GDM as fasting glucose of  
424  $\geq 5.3$ mmol/l. The rationale for selecting these cut-points are based on epidemiologic studies  
425 reporting the association between glycaemia and maternal and foetal outcomes in pregnancy, and  
426 evidence from clinical trials on the effect of reducing hyperglycaemia on clinical outcomes. The  
427 IADPSG criteria have now been accepted by WHO, American Diabetes Association (ADA), Endocrine  
428 society, Federation of International Gynaecological and Obstetric societies (FIGO), and European  
429 Board and College of Obstetrics and Gynaecology (EBCOG).

430

431 **6.1.2. How common is Gestational Diabetes Mellitus?**

432

433 ATLANTIC Diabetes in Pregnancy (Atlantic DIP) was established in 2006 and covers a population of  
434 500,000 with 11,000 deliveries annually across 5 antenatal centres in Ireland. Women from both  
435 urban and rural locations are included as are those having both public and private health care.  
436 Atlantic DIP carries out observational cohort studies and randomised control trials in pregnant women  
437 with diabetes. One such study was a prospective cohort study to estimate GDM prevalence when  
438 applying universal screening and IADPSG criteria to a regional population. GDM prevalence was  
439 found to be 12.4% (O Sullivan 2011). Increasing age, previous GDM, obesity, and family history of  
440 diabetes are known risk factors. Internationally, GDM prevalence is quoted at 17% with a range of 9-  
441 25% across 15 centres (Sacks 2012).

442

443 **6.1.3. Why is Gestational Diabetes Mellitus Clinically Important in the Short Term?**

444

445 The association between maternal glycaemia and pregnancy outcome represents a continuum of  
446 increasing risk of adverse outcomes. In ATLANTIC-DIP, GDM was associated with increased adverse  
447 maternal and neonatal outcomes (O Sullivan 2011). In particular, maternal hypertensive disorders  
448 were increased 2 fold (OR 1.5 CI 1-2), and delivery by Caesarean section increased by 30% (OR 1.3  
449 CI 1-1.6). There was a significant increase in macrosomia (birth weight  $> 4$ kg) at 23.9% compared to  
450 17% in women without diabetes ( $P < 0.05$ ) and also in the delivery of LGA babies ( $> 90^{\text{th}}$  centile) at  
451 22.6% compared to 16.2% in normal glucose tolerant (NGT) women ( $P < 0.01$ ). The admission rate to  
452 neonatal unit care (NNU) was 26% compared to 9.1% in NGT women ( $P < 0.0001$ ) and the main  
453 reason for admission was hypoglycaemia at a rate of 2.4% compared to 0.6% in NGT women  
454 ( $P < 0.0001$ ). Obesity in pregnancy was shown to be a growing problem contributing to GDM but also  
455 causing significant independent morbidities for the mother and infant (Dennedy 2012). Caesarean  
456 deliveries increased in overweight (OW) and obese (OB) women significantly with OR of 1.57 (CI  
457 1.24-1.98) and 2.65 (OR 2.03-3.46) respectively. Hypertensive disorders in pregnancy were also  
458 greater with an OR of 2.3 (CI 1.55-3.4) and 3.29 (CI 2.14-5.05) in OW and OB women respectively.  
459 Mean birth weight was 3.46Kg in offspring of normal BMI women rising to 3.56kg and 3.62 kg in OW  
460 and OB women respectively ( $P < 0.01$ ). Macrosomia occurred in 15.5%, 21.4% and 27.8% of normal  
461 OW and OB women respectively ( $P < 0.01$ ). The cost of diagnosing and managing GDM in Ireland is

462 substantial (Gillespie 2013). GDM pregnancies incur an additional cost of circa 30% driven mainly by  
463 NNU care admissions and delivery by Caesarean section. Obesity is also a significant contributor to  
464 costs.  
465

#### 466 **6.1.4. Why is Gestational Diabetes Mellitus Clinically Important in the Long Term?**

467  
468 Atlantic DIP found persistent glucose abnormalities in 19% of GDM women in the first 6 month's post-  
469 partum compared with 2.7% in women with NGT in pregnancy (O Reilly 2011). Gestational insulin use  
470 increased the chance of having persistent post-partum glucose abnormalities (OR 2.62; CI 1.17-5.87),  
471 while breast-feeding compared to bottle feeding had a protective effect (8.2% vs. 18.4%;  $P < 0.001$ ) (O  
472 Reilly 2011). Women were again rescreened up to 5 years post the index pregnancy (mean 2.6 years)  
473 and on-going glucose abnormalities were present in 26% of women with prior GDM compared to 4%  
474 of women with NGT in the index pregnancy (Noctor 2016). Persistent glucose abnormalities  
475 correlated with fasting blood glucose  $> 5.1$  mmol/l on pregnancy OGTT (OR 2.9; CI 1.5 to 5.3). The  
476 likelihood of persistent glucose abnormalities increased in OW and OB women with OR 2.5; CI 1.1 to  
477 5.7 and OR 3.7; CI 1.6 to 8.5 respectively. Breast feeding was once again protective OR 0.5; CI 0.3 to  
478 0.9 (Noctor 2012). As well as glucose related problems, women also have an increased risk of  
479 metabolic syndrome (Noctor 2015). Internationally GDM mothers are seven times more likely to  
480 develop type 2 diabetes (RR 7.43, 95% CI 4.79—11.51)(Bellamy 2009). As well as the perinatal  
481 impacts of GDM, children of GDM mothers are at increased risk of glucose abnormalities in childhood  
482 (Zhu 2016) metabolic syndrome (MetS) and obesity (Vaarasmaki 2009; Clausen 2009) in  
483 adolescence and pre-diabetes and diabetes in early adult life (Launenborg 2011). In addition, there is  
484 a growing body of evidence linking metabolic diseases in pregnancy to Autism Spectrum Disorders  
485 (ASD) in offspring (Krakowiak 2012).  
486

#### 487 **6.1.5. Does Treating GDM Improve Clinical Outcomes?**

488  
489 While active management of GDM is associated with significantly improved perinatal outcomes  
490 (Crowther 2005; Landon 2009) there are limitations to our current approach. Once a mother is  
491 diagnosed with GDM, the initial approach to management is medical nutritional therapy (MNT) and  
492 exercise (30 minutes per day) for 2 weeks, which is successful in controlling glucose levels in  
493 approximately 60% of women with GDM and in reducing perinatal morbidities and infant size to that of  
494 women with NGT (Kgosidialwa 2015). When glucose targets are not met (approximately 35-40% of  
495 GDM women), insulin therapy is ordinarily prescribed usually after 2-4 weeks, and considered usual  
496 care in Ireland. Insulin therapy is also effective in normalising perinatal outcomes to that of women  
497 with NGT (Bogdanet 2016) but is associated with increased rates of Caesarean delivery and need for  
498 NNU care. In the USA glyburide is advocated as first line therapy by the American College of  
499 Obstetrics and Gynaecology (ACOG) while the recently updated NICE guidelines advocate metformin  
500 as first line therapy in the UK. A recent meta-analysis of treatments for GDM found metformin to be  
501 slightly better than insulin with glyburide inferior to both treatments (Balsells 2015). In the USA  
502 analysis of glyburide compared to insulin for treatment of GDM found glyburide to be associated with  
503 an increase in adverse perinatal outcomes (Castillo 2015).  
504

#### 505 **6.1.6. Limitations of Insulin Therapy**

506  
507 Insulin therapy administered by injection is associated with an increased risk of maternal  
508 hypoglycaemia, excess maternal weight gain and increased risk of operative delivery (Egan 2013). In  
509 addition, the excess weight gain, associated with insulin use, increases insulin requirements further.  
510 Furthermore, 40% of women have an extended period (2-4 weeks) of possible hyperglycaemia  
511 between initiation of MNT and exercise and introduction of insulin therapy. This may predispose to  
512 sub optimal glycaemic control, which is associated with an increased risk of hypoglycaemia in the

513 infant following delivery. Gestational weight gain (GWG) is defined by the American Institute of  
514 Medicine (IOM) according to the woman's booking BMI. Excessive GWG is gaining momentum as an  
515 additional independent risk factor contributing to a higher odds ratio of development of macrosomia  
516 and LGA. We recently carried out analysis of the Atlantic DIP dataset to determine how many women  
517 exceeded the IOM guidelines for appropriate weight gain in pregnancy and whether excessive GWG  
518 was associated with a further increase in adverse outcomes in pregnancies already at risk. We found  
519 that excessive GWG occurred in > 60% of women with GDM. Excessive GWG defined by IOM  
520 guidelines further increased the odds ratio of LGA (aOR 2.008; CI 1.241 to 3.248) and macrosomia  
521 (aOR 2.166; CI 1.321 to 3.550) significantly on a multivariate analysis when all other contributing  
522 variables were adjusted for (Egan 2013). Treatment with insulin further increased the adjusted odds  
523 for LGA (aOR 2.802; CI 1.231 to 6.379). Excessive GWG in women with GDM also increased OR of  
524 pregnancy induced hypertension (aOR 1.719; CI 1.037 to 2.852). This suggests that a focus on  
525 minimising excessive GWG is important and opens the debate regarding the usefulness and  
526 effectiveness of insulin as the preferred treatment modality in women where MNT fails.

527

### 528 **6.1.7. Metformin use for GDM**

529

530 In many European countries oral hypoglycaemic agents (e.g. metformin or glyburide) are used for  
531 glucose control, when diet and exercise interventions have failed. National Irish guidelines do not  
532 advocate the use of oral hypoglycaemic agents for glucose control in GDM. However, there is now a  
533 good body of research that has evaluated the use of metformin in GDM. The most conclusive  
534 evidence on the safety of metformin comes from the MiG study (Rowan 2008) in which 752  
535 participants were randomly assigned to metformin or insulin. Metformin did not increase the risk of  
536 perinatal morbidities, compared to insulin. However, in that trial, metformin was only used in obese  
537 patients (BMI >30) who had failed lifestyle interventions. An open label prospective RCT (Ljas 2011)  
538 reported less macrosomia especially in lean (BMI < 25) or moderately overweight (BMI > 25<30)  
539 participants with metformin treatment. Studies on the long-term effects of metformin are also  
540 encouraging. Glueck (2004) followed offspring whose mothers received metformin and found normal  
541 weight, height, social and motor skills at 18 months with no differences when compared to unexposed  
542 infants. Rowan (2011) showed reassuring results when 2 year olds were examined following the MiG  
543 trial, and found no difference in total body fat in children of mothers treated with metformin compared  
544 to those treated with insulin, but a suggestion of more favourable metabolic distribution of fat. Rowan  
545 et al also reported metformin to be a more acceptable and satisfying treatment than insulin (Rowan  
546 2008), more participants said they would choose metformin in a subsequent pregnancy (76.6%)  
547 compared with 27.2% in the insulin group (p<0.001). In a cross-sectional study of 197 participants  
548 with GDM, Latif (2013) found that participants treated with metformin alone were more satisfied with  
549 treatment and had higher Quality of Life scores than participants treated with insulin. It seems likely  
550 therefore that metformin may have an important role to play in patient reported outcomes affecting the  
551 lives of women diagnosed with GDM. Finally a recent meta-analysis of treatments for GDM found  
552 metformin to be slightly better than insulin with glyburide inferior to both treatments (Baisells 2015).

553

554 While metformin crosses the placenta (Vanky 2005), there are a large number of studies reporting the  
555 safety of metformin in pregnancy, for mother and child. Metformin has been used extensively in  
556 women with Polycystic Ovarian Syndrome (PCOS) who have become pregnant (Tang 2010), and no  
557 increase in adverse effects has been reported. Metformin has been used in South Africa since the  
558 1970s and perinatal mortality is similar in women treated with metformin and insulin (Coetzee 1984).  
559 Goh (2011) examined pregnancy outcomes for 1269 women, 465 of whom received metformin. Those  
560 receiving metformin had fewer adverse outcomes compared to those treated with insulin. Three meta-  
561 analyses (Gutzin 2003; Gilbert 2006; Juan Gui 2013) including over 1500 participants reported no  
562 increase in congenital abnormalities or neonatal deaths with metformin. Juan Gui (2013) concluded  
563 that metformin was comparable with insulin for glycaemic control and neonatal outcomes, favouring  
564 metformin in respect of GWG, size at delivery, incidence of pregnancy induced hypertension (PIH)



565 and preeclampsia (PET) and that metformin might be especially suitable for mild GDM patients. A  
566 recently published study looking at the benefits of metformin in obese pregnant participants without  
567 GDM (EMPOWER) was not associated with adverse events related to metformin use (Chiswick  
568 2015). Finally a large RCT is being conducted to examine the benefits of metformin in participants  
569 with Type 2 diabetes in pregnancy (MiTy trial).

570

571 The evidence to date on the safety of metformin in GDM is robust in selective and selectively  
572 screened populations. However, the evidence of the benefits of metformin in a broader spectrum of  
573 'all' GDM pregnancies in women of all Body Mass Index (BMI) categories and irrespective of the  
574 success of lifestyle interventions for the treatment of GDM undergoing universal screening with  
575 IADPSG criteria is absent. Additionally, interventions to improve glycaemia and at the same time  
576 minimise excess gestational weight gain in GDM are also needed.

577

578 Overall therefore we have found a rising prevalence of GDM and obesity in women in Ireland, both  
579 associated with an increase in adverse outcomes for mother and infant in the index pregnancy and a  
580 worrying prevalence of persistent glucose abnormalities over time. More recently the impact of  
581 excessive GWG and insulin treatment on the already established increased adverse outcomes adds  
582 further complexity to this condition and its management. We now wish to explore if the introduction of  
583 metformin in addition to usual care at the time of initial GDM diagnosis (i.e. along with diet and  
584 exercise interventions) in all women screened and diagnosed by IADPSG criteria, is effective in  
585 reducing the incidence of hyperglycemia, measured by the need for insulin treatment during  
586 pregnancy or reducing rate of fasting glucose  $\geq 5.1$  mmol/l at gestational week 32 or 38. We will also  
587 determine its effect on excessive GWG, and translating these effects into better outcomes for mothers  
588 and their babies. We also wish to establish if early intervention with metformin is more cost effective  
589 and acceptable to, and increases satisfaction for women with GDM. Finally, this study will form the  
590 basis of future applications to establish the benefits of metformin on prevalence of Type 2 diabetes  
591 and obesity in the mother and offspring longitudinally.

592

## 593 6.2. RATIONALE FOR THE STUDY

594

595 GDM results from a combination of reduced insulin sensitivity and/or reduced insulin production.  
596 Metformin increases insulin sensitivity and thus it has potential as a treatment option in GDM.  
597 Metformin is weight neutral and not associated with hypoglycaemia, two factors that would increase  
598 its acceptability for pregnancy, and represents an advantage over insulin. Metformin has been shown  
599 to be safe in pregnancy (for mother and baby), when it is introduced after failure of diet and exercise.  
600 However, in many countries (including Ireland), insulin therapy remains the standard of care for  
601 treatment of GDM, in women who have failed to achieve normo-glycemia after diet and exercise.  
602 Distinct from previous clinical trials, we plan to evaluate the use of metformin (compared to placebo)  
603 at the time of initial GDM diagnosis (i.e. at the same time as diet and exercise interventions), and  
604 evaluate its use in all women with GDM, not just those with elevated BMIs.

605

606 The EMERGE trial will evaluate metformin introduced at the time of GDM diagnosis in participants of  
607 all BMI categories, to determine whether treating all participants with GDM (rather than just those who  
608 fail MNT/exercise) results in better outcomes for mothers and babies. The primary outcome is the  
609 development of hyperglycemia, represented as the composite of initiation of insulin (as this reflects  
610 clinically meaningful hyperglycemia) or a venous fasting glucose measurement  $\geq 5.1$  mmol/l at weeks  
611 32 or 38 of gestation. Secondary outcome measures include excessive GWG, neonatal and maternal  
612 outcomes. Finally, we will conduct an extensive cost benefit and cost utility analysis of metformin use  
613 in GDM pregnancy. Results of the EMERGE trial may have a considerable impact on clinical practice  
614 by providing evidence to support early active management with metformin at the time of diagnosis in a  
615 broader GDM population.

616 Study Drug administration: Metformin and matched placebo are administered orally. Both will be  
617 administered from the time of GDM diagnosis (up to 28 weeks + 6 days gestation) to delivery or  
618 termination of the pregnancy. Metformin will be given in tablets of 500mg. The dose will be titrated  
619 over a two-week period and will commence at 1 tablet per day (500mg) increasing to maximum of 5  
620 tablets per day (2500mg). This dosing regimen will minimise any possible nausea associated with  
621 metformin and is in line with the dosing schedule of metformin in a previous GDM trial (MiG), the  
622 EMPOWER study of obese pregnant participants and an on-going trial in Type 2 diabetes in  
623 pregnancy (MiTy).

624

## 625 **7. STUDY OBJECTIVES**

626

627 The overall objective of the EMERGE trial is to determine whether metformin + usual care, compared  
628 to placebo + usual care (introduced at the time of initial diagnosis of GDM), reduces a) the need for  
629 insulin use or hyperglycemia (primary outcome measure); b) excessive maternal weight gain; c)  
630 maternal and neonatal morbidities and, d) cost of treatment for participants with Gestational Diabetes  
631 Mellitus.

632

### 633 **7.1. Primary objective**

634

635 The primary objective is to determine if metformin reduces the requirement for insulin or reduces the  
636 rate of fasting hyperglycaemia ( $\geq 5.1$  mmol/l) at gestational weeks 32 or 38.

637

### 638 **7.2. Secondary objectives**

639

640 Additional secondary objectives of this study are:

- 641 1. To determine if metformin delays the initiation of insulin
- 642 2. To determine if metformin reduces the insulin dose required (and dose/kg/week of gestation)
- 643 3. To determine if metformin impacts on maternal body weight, BMI, waist circumference, blood  
644 glucose status, insulin resistance status and metabolic syndrome postpartum
- 645 4. To determine if metformin reduces the proportion of infants with morbidities
- 646 5. To determine if metformin in addition to usual care reduces infant birth weight when compared to  
647 usual care alone
- 648 6. To determine if metformin reduces the proportion of maternal morbidities when compared to usual  
649 care alone
- 650 7. To determine if metformin in addition to usual care reduces excessive maternal gestational weight  
651 gain (GWG)
- 652 8. To determine if participants consider metformin a more acceptable treatment than insulin
- 653 9. To determine the cost, cost effectiveness, and budget impact of metformin in addition to usual  
654 care for GDM

655

### 656 **7.3. Primary and secondary outcome measures**

657

#### 658 **7.3.1. Primary Outcome Measure**

659

660 A composite primary outcome of insulin initiation or fasting venous glucose  $\geq 5.1$  mmol/l on study  
661 specific fasting laboratory glucose at gestational weeks 32 or 38 will be used. This approach allows us  
662 to measure 'treatment failure' in two discreet ways. Introduction of insulin reflects clinically meaningful  
663 hyperglycaemia, and is measured at any time during the clinical trial. In addition, a standardised  
664 fasting glucose will be completed at gestational weeks 32 or 38 to capture additional participants who  
665 have fasting hyperglycaemia but have not had insulin introduced during the clinical trial.

**666 7.3.2. Secondary Outcome Measures**

667

- 668 1. Time to insulin initiation and insulin dose required
- 669 2. Maternal morbidity at delivery (hypertensive disorders, antepartum and postpartum haemorrhage)
- 670 3. Mode and time of delivery
- 671 4. Postpartum glucose status, insulin resistance, and metabolic syndrome
- 672 5. Postpartum BMI, gestational weight gain, and waist circumference
- 673 6. Infant birth weight
- 674 7. Neonatal height and head circumference at delivery
- 675 8. Neonatal morbidities (Need for neonatal care unit, respiratory distress, jaundice, congenital anomalies, Apgar score)
- 676
- 677 9. Neonatal hypoglycaemia (defined as plasma glucose <2.6mmol/L on one or more occasions
- 678 starting 30-60 minutes after birth)
- 679 10. Cost effectiveness and budget impact of metformin treatment in addition to usual care
- 680 11. Treatment acceptability (DTSQ and Rowan questionnaires)
- 681 12. Quality of Life determined by EQ5D-5L questionnaire

682

**683 8. TRIAL DESIGN**

684

**685 8.1. Design Summary**

686

687 A phase III, parallel, randomised double-blind, placebo-controlled, trial of metformin (in addition to  
688 usual care) versus usual care in 550 participants with Gestational Diabetes Mellitus (GDM) across  
689 upto 3 sites in the Republic of Ireland, followed until 12 weeks post-partum (+/- 4 weeks).

690

691 Eligible participants will be randomised to one of two groups; treatment group or placebo group.

692

**693 8.1.1. Treatment Group**

694

695 Participants randomised to the metformin group will receive metformin 500mg OD, with the dose  
696 titrated upwards every 2 days over 10 days increasing to a maximum of 2500mg metformin daily (5  
697 tablets) or maximum tolerated dose, in addition to usual care (exercise and MNT), and taken until  
698 delivery.

699

**700 8.1.2. Placebo Group**

701

702 Participants randomised to the placebo group will receive 1 placebo tablet OD, with the dose titrated  
703 upwards every 2 days over 10 days increasing to a maximum of five placebo tablets daily, in addition  
704 to usual care (exercise and MNT), and taken until delivery.

705

706 Participants will be followed up at 4 weeks (+/- 7days) and at 12 weeks (+/- 4 weeks) post-partum for  
707 additional maternal and neonatal outcomes.

708

**709 8.1.3. Usual Care**

710

711 Both the treatment and metformin group will receive usual care which consists of medical nutritional  
712 therapy (MNT) and information on exercise provided by the Diabetes team or trained delegate. The  
713 Diabetes team or trained delegate will instruct participants on the use of a glucometer and the  
714 participants will perform 7-point glucose testing before and 1 hour after meals and before bed.  
715 Participants will be supported by telephone contact from the Diabetes team or trained delegate

716 weekly throughout gestation and attend at 2-4 weekly intervals at an antenatal/diabetes clinic. Usual  
717 care is outlined in more detail in section 9.1.1.

718

719 Figure 1: Schematic Diagram of Trial Design

720

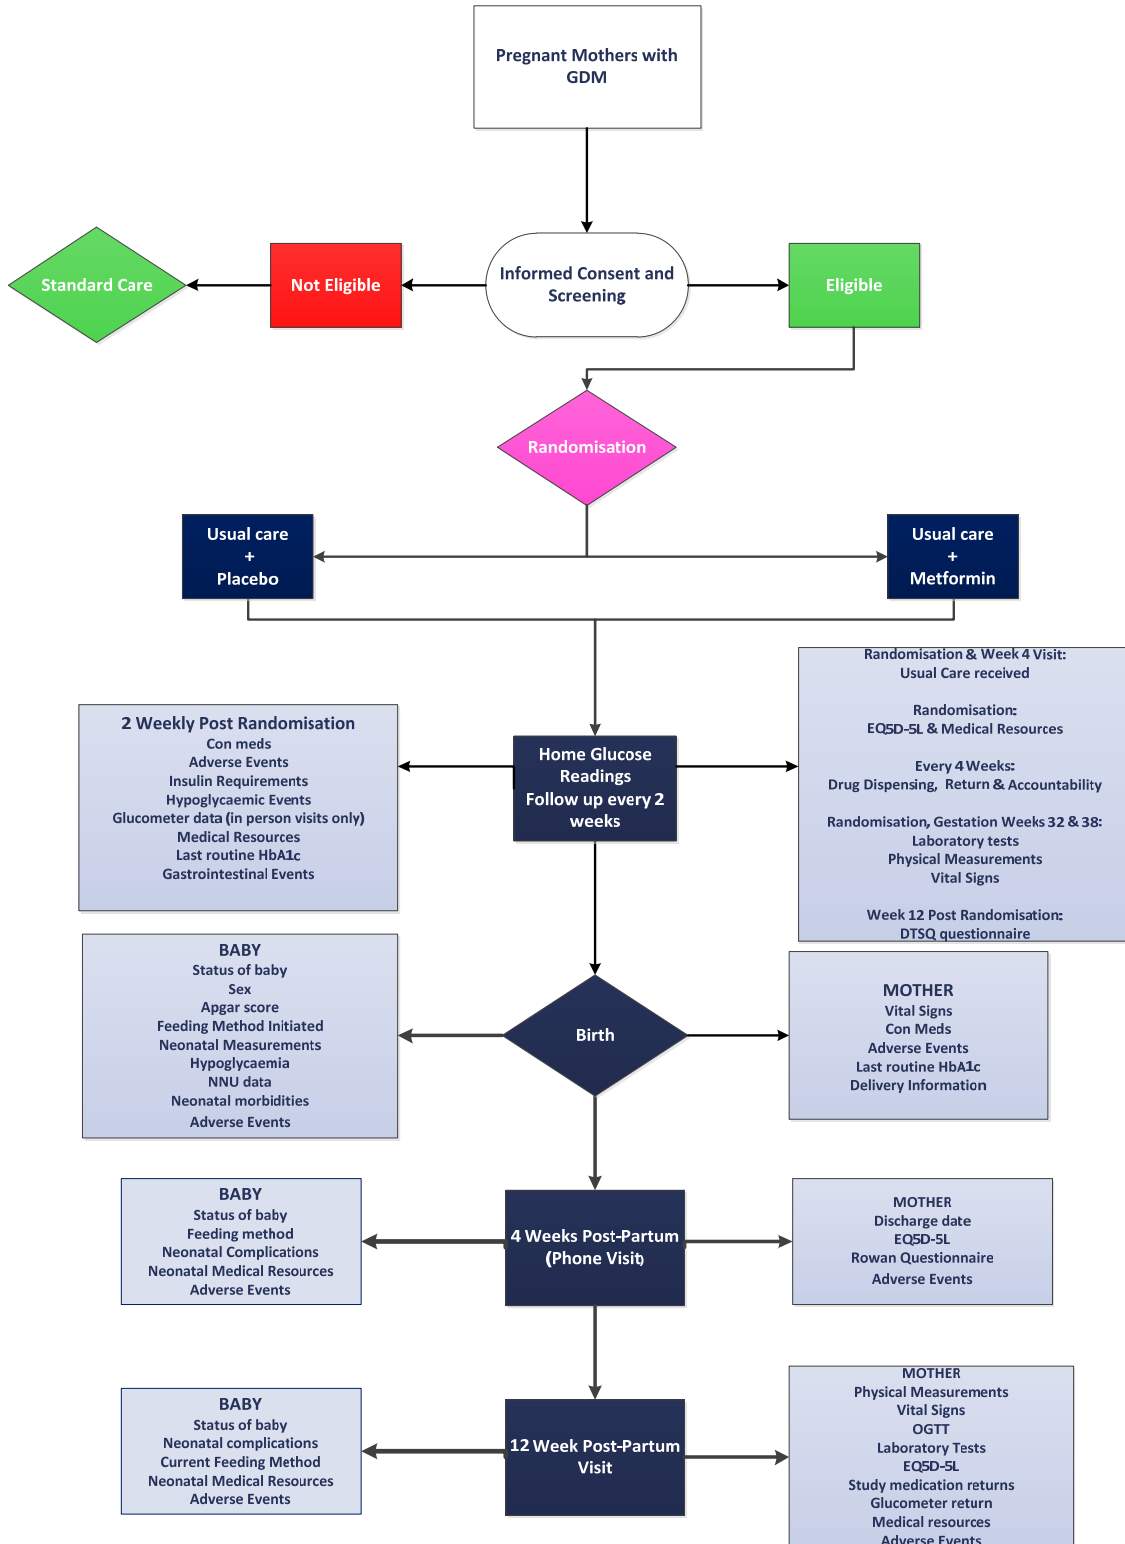

721

722

723

724 **8.2. Selection of Study Population**

725

726 **8.2.1. Population**

727

728 The population for the trial is pregnant participants between the ages of 18-50 years, with a diagnosis  
729 of GDM up to 28 weeks gestation (+ 6 days).

730

731 Participants diagnosed using a 75g oral glucose tolerance test (OGTT) and International Association  
732 of Diabetes in Pregnancy Study Groups (IADPSG) criteria for diagnosis will be eligible to be enrolled  
733 in the study. Eligible participants must be resident and intending to deliver within the selected trial  
734 sites. The geographical area and study population includes participants from urban and rural locations  
735 and participants in both public and private health care.

736

737 In order to be eligible for the trial participants must meet all of the inclusion criteria and none of the  
738 exclusion criteria listed below.

739

740 **8.2.2. Inclusion Criteria**

741

- 742 a) Willing and able to provide written informed consent
- 743 b) Participants aged 18-50 years
- 744 c) Pregnancy gestation up to 28 weeks (+ 6 days) confirmed by positive pregnancy test
- 745 d) Singleton pregnancy as determined by scan
- 746 e) Positive diagnosis of Gestational Diabetes Mellitus on a OGTT according to IADPSG criteria if  
747 any one of the following are achieved:
  - 748 a. Fasting glucose  $\geq 5.1$ mmol/l and  $<7$ mmol/l, or
  - 749 b. 1 hour post glucose load of  $\geq 10$ mmol/l, or
  - 750 c. 2 hour post glucose load of  $\geq 8.5$  mmol/l and  $<11.1$ mmol/l
- 751 f) Resident in the locality and intending to deliver within the trial site

752

753 **8.2.3. Exclusion Criteria**

754

755 Participants who meet any one or more of the following exclusion criteria will not be eligible to take  
756 part in the trial:

757

- 758 a) Participants who have an established diagnosis of diabetes (Type 1, Type 2, Monogenic or  
759 secondary)
- 760 b) Participants with a fasting glucose  $\geq 7$ mmol/l or a 2h value  $\geq 11.1$  mmol/l
- 761 c) Multiple pregnancies (twins, triplets etc.) as determined by scan
- 762 d) Known intolerance to metformin
- 763 e) Known contraindication to the use of metformin which include:
  - 764 i. renal insufficiency (defined as serum creatinine of greater than 130  $\mu$ mol/L or  
765 creatinine clearance  $<60$  ml/min)
  - 766 ii. moderate to severe liver dysfunction (aspartate aminotransferase (AST) or alanine  
767 aminotransferase (ALT) greater than 3 times the upper limit of normal)
  - 768 iii. shock or sepsis, and
  - 769 iv. previous hypersensitivity to metformin
- 770 f) Major congenital malformations or an abnormality deemed unsuitable for metformin by the  
771 site PI or attending consultant.
- 772 g) Known small for gestational age<sup>1</sup>
- 773 h) Known current gestational hypertension, pre-eclampsia, or ruptured membranes

- 774 i) Participants who have a history of drug or alcohol use that, in the opinion of the investigator,  
775 would interfere with adherence to study requirements
- 776 j) Participants with significant gastrointestinal problems such as severe vomiting, Crohn's  
777 disease or colitis which will inadvertently affect absorption of the study drug
- 778 k) Participants with congestive heart failure or history of congestive heart failure
- 779 l) Participants with serious mental illness which would affect adherence to study medication or  
780 compliance with study protocol in the opinion of the investigator
- 781 m) Participants with rare hereditary problems of galactose intolerance, Lapp lactase deficiency  
782 or glucose-galactose malabsorption
- 783

784 <sup>1</sup>Small for gestational age (SGA) refers to fetal growth less than the 10th percentile (RCOG, 2014), or  
785 as determined by the treating obstetrician

786

### 787 8.3. Study Visits and procedures

788

#### 789 8.3.1. Screening and Randomisation Visit and Procedures

790

791 Screening for GDM will be conducted in the trial sites for all participants. Participants will receive a  
792 75g OGTT scheduled as part of routine care which they can opt out of if they wish. GDM will be  
793 diagnosed according to the IADPSG criteria if any one of the following are achieved; fasting glucose  
794  $\geq 5.1$  mmol/l and  $< 7$  mmol/l, 1 hour post glucose load of  $\geq 10$  mmol/l, and 2 hour post glucose load  
795 of  $\geq 8.5$  mmol/l and  $< 11.1$  mmol/l. Those with a positive OGTT will receive usual care of MNT and  
796 exercise advice from the Diabetes team or trained delegate, and will also be approached for consent  
797 for screening into the trial. Consenting participants will then be screened for eligibility.

798

799 Screening will consist of the following procedures:

- 800 1. Review of inclusion/exclusion criteria
- 801 2. Review of medical history including previous pregnancy history
- 802 3. Review of concomitant medications
- 803 4. Current pregnancy information including date of last menstrual period, estimated date of delivery,  
804 gestational week, para and gravida.

805

806 All screening procedures will be documented in the medical notes by the research nurse.

807

808 The results of the screening visit will be reviewed and eligibility will be signed off by the investigator or  
809 delegate. Once eligibility has been confirmed, participants will be randomised to a study arm and  
810 assigned a Participant ID using the web based randomisation service. The timeline for randomisation  
811 is up to 28 weeks (+6 days) gestation, which can occur on the same day as screening or up to 7 days  
812 post-screening.

813

814 Participants at all trial sites will also be invited to partake in a bio-banking sub-study which involves  
815 obtaining maternal blood samples at randomisation and gestational age 38 weeks (+/- 1 week) and  
816 also a cord blood sample at delivery. This is executed under a separate Ethics Committee approved  
817 protocol and is executed as guided by local practice patterns and the availability of resources  
818 (including staff).

819

820 Once the participant has been randomised, additional data collected will include:

821

- 822 1. Physical measurements and vital signs (heart rate, BP, height, weight)
- 823 2. Demographics (date of birth (DOB), race)

- 824 3. Social history (smoking and alcohol)
- 825 4. Socioeconomic status
- 826 5. Baseline gastrointestinal symptoms
- 827 6. EQ5D-5L Questionnaire
- 828 7. Laboratory tests (see section 8.4.5)
- 829 8. Medical resources used since diagnosis of pregnancy
- 830 9. Usual care received

831

832 The participant will then be dispensed study medication and administration instructions. The pack  
833 numbers of dispensed medication will be documented on the dispensation log.

834

### 835 8.3.2. Prenatal Visit and Procedures

836

837 Prenatal visits will occur approximately every 2 weeks post randomisation in line with routine  
838 antenatal clinic visits. Visits that do not require an in person physical measurement, laboratory  
839 assessment or drug dispensation can be completed over the telephone. The following data will be  
840 collected and procedures will be performed:

841

- 842 1. Gestational age in weeks
- 843 2. Review of concomitant medications
- 844 3. Review of insulin requirements
- 845 4. Review of adverse events
- 846 5. Gastrointestinal symptom review
- 847 6. Review of hypoglycaemic events
- 848 7. Review of medical resources used
- 849 8. Glucometer data download (at in person visits only, see section 8.4.7.)

850

851 The following data will be collected in addition to the above:

852

- 853 1. Study drug dispensing (every 4 weeks)
- 854 2. Physical measurements and vital signs (heart rate, BP and weight to be taken at gestational  
855 weeks 32 (+/- 1 week) and 38 (+/- 1 week))
- 856 3. Usual care received (week 4)
- 857 4. Laboratory tests (at gestational week 32 (+/- 1 week) AND at gestational week 38 (+/- 1  
858 week), see section 8.4.5.)
- 859 5. DTSQ (gestational week 38 (+/- 1 week) or as soon as possible thereafter)
- 860 6. Study Drug Accountability (every 4 weeks)

861

### 862 8.3.3. Delivery Visit

863

864 The delivery visit will occur up to 72 hours post-delivery, while the participant is in the post natal ward.  
865 Should the participant be discharged early, or it is not possible to see the participant within the visit  
866 window (e.g. delivery occurs out of hours), every effort will be made to gather the information from the  
867 medical notes or through telephone contact. The following data will be collected and procedures will  
868 be performed:

869

- 870 1) Vital signs (heart rate, BP)
- 871 2) Review of concomitant medications
- 872 3) Review of adverse events (mother and baby)
- 873 4) Last routine HbA1c recorded
- 874 5) Delivery information (time, date and mode of delivery, and complications)

- 875 6) Feeding method initiated  
876 7) Neonatal procedures (status of baby, sex, neonatal measurements, Apgar score,  
877 hypoglycaemia, respiratory distress, jaundice and congenital anomalies)  
878 8) Neonatal care unit data  
879 9) Neonatal medical resources  
880

#### 881 **8.3.4. Phone Visit (Visit 1 Post-Partum)**

882

883 A phone visit will take place 4 weeks (+/- 7 days) post-partum. The following data will be collected:

884

- 885 1) Status of the baby  
886 2) Current Feeding method  
887 3) Neonatal complications  
888 4) Discharge date  
889 5) Questionnaires (EQ5D-5L, Rowan Questionnaire)  
890 6) Adverse Events (mother and baby)  
891

892 An appointment will be scheduled for the 12 week post-partum visit by the research nurse.  
893

#### 894 **8.3.5. 12 Week Post-Partum Visit (Visit 2 Post-Partum)**

895

896 The post-partum visit will take place 12 weeks post-partum (+/- 4 weeks) and will be conducted in  
897 person. The following data will be collected and procedures will be performed:  
898

- 899 1) Physical measurements (heart rate, BP, height, weight and waist circumference)  
900 2) 75g OGTT  
901 3) Laboratory tests (see section 8.4.5)  
902 4) Questionnaires (EQ5D-5L)  
903 5) Study medication returns  
904 6) Status of baby  
905 7) Neonatal complications  
906 8) Current feeding method  
907 9) Return Glucometer and data download  
908 10) Medical care received since delivery  
909 11) Adverse Events (mother and baby)  
910

911 An outline of scheduled study assessments and procedures are outlined below in figure 2.  
912  
913  
914  
915  
916  
917  
918  
919



| Schedule of Visits          |                     |                     |                     |                     |                     |                      |                      |                                     |                       |                                  |                                   |
|-----------------------------|---------------------|---------------------|---------------------|---------------------|---------------------|----------------------|----------------------|-------------------------------------|-----------------------|----------------------------------|-----------------------------------|
|                             | Visit1              | Visit2              | Visit3              | Visit4              | Visit5              | Visit6               | Visit7               | Additional Visit (s)                | Delivery Visit        | Visit1 pp                        | Visit2 pp                         |
| Weeks Post-Randomisation    | Week 0 <sup>a</sup> | Week 2 <sup>c</sup> | Week 4 <sup>c</sup> | Week 6 <sup>c</sup> | Week 8 <sup>c</sup> | Week 10 <sup>c</sup> | Week 12 <sup>c</sup> | Additional Visit (s) <sup>b,c</sup> | Delivery <sup>d</sup> | 4 weeks Post-partum <sup>e</sup> | 12 weeks Post-partum <sup>f</sup> |
| <b>Maternal Procedures</b>  |                     |                     |                     |                     |                     |                      |                      |                                     |                       |                                  |                                   |
| Informed Consent            | X                   |                     |                     |                     |                     |                      |                      |                                     |                       |                                  |                                   |
| Inclusion/Exclusion         | X                   |                     |                     |                     |                     |                      |                      |                                     |                       |                                  |                                   |
| Medical History             | X                   |                     |                     |                     |                     |                      |                      |                                     |                       |                                  |                                   |
| Demographics/social history | X                   |                     |                     |                     |                     |                      |                      |                                     |                       |                                  |                                   |
| Concomitant Medications     | X                   | X                   | X                   | X                   | X                   | X                    | X                    | X                                   | X                     | X                                | X                                 |
| Current Pregnancy           | X                   |                     |                     |                     |                     |                      |                      |                                     |                       |                                  |                                   |
| Randomisation               | X                   |                     |                     |                     |                     |                      |                      |                                     |                       |                                  |                                   |
| Socioeconomic status        | X                   |                     |                     |                     |                     |                      |                      |                                     |                       |                                  |                                   |
| Gastrointestinal symptoms   | X                   | X                   | X                   | X                   | X                   | X                    | X                    | X                                   |                       |                                  |                                   |
| Medical resources           | X                   | X                   | X                   | X                   | X                   | X                    | X                    | X                                   |                       |                                  | X                                 |
| Vital signs                 | X                   |                     | X <sup>i</sup>      | X <sup>i</sup>      | X <sup>i</sup>      | X <sup>i</sup>       | X <sup>i</sup>       | X <sup>i</sup>                      | X                     |                                  | X                                 |
| Height and Weight           | X                   |                     | X <sup>i</sup>      | X <sup>i</sup>      | X <sup>i</sup>      | X <sup>i</sup>       | X <sup>i</sup>       | X <sup>i</sup>                      |                       |                                  | X                                 |
| Waist Circumference         |                     |                     |                     |                     |                     |                      |                      |                                     |                       |                                  | X                                 |
| OGTT                        | X                   |                     |                     |                     |                     |                      |                      |                                     |                       |                                  | X                                 |
| Laboratory tests            | X                   |                     | X <sup>g</sup>      | X <sup>g</sup>      | X <sup>g</sup>      | X <sup>g</sup>       | X <sup>g</sup>       | X <sup>g</sup>                      |                       |                                  | X                                 |
| Usual Care                  | X                   |                     | X                   |                     |                     |                      |                      |                                     |                       |                                  |                                   |
| Study Drug Dispensing       | X                   |                     | X                   |                     | X                   |                      | X                    | X <sup>j</sup>                      |                       |                                  |                                   |
| Glucometer Data             |                     | X <sup>k</sup>       | X <sup>k</sup>       | X <sup>k</sup>                      |                       |                                  | X                                 |
| Hypoglycaemic events        |                     | X                   | X                   | X                   | X                   | X                    | X                    | X                                   |                       |                                  |                                   |
| Insulin Initiation data     |                     | X                   | X                   | X                   | X                   | X                    | X                    | X                                   |                       |                                  |                                   |
| Study Drug Accountability   |                     |                     | X                   |                     | X                   |                      | X                    | X <sup>l</sup>                      |                       |                                  | X                                 |
| Return Study Drug           |                     |                     | X                   |                     | X                   |                      | X                    | X <sup>l</sup>                      |                       |                                  | X                                 |
| Delivery information        |                     |                     |                     |                     |                     |                      |                      |                                     | X                     |                                  |                                   |
| Mode of Delivery            |                     |                     |                     |                     |                     |                      |                      |                                     | X                     |                                  |                                   |
| Time of Delivery            |                     |                     |                     |                     |                     |                      |                      |                                     | X                     |                                  |                                   |
| Delivery complications      |                     |                     |                     |                     |                     |                      |                      |                                     | X                     |                                  |                                   |
| DTSQ                        |                     |                     |                     |                     |                     |                      | X <sup>h</sup>       |                                     |                       |                                  |                                   |
| EQ5D-5L                     | X                   |                     |                     |                     |                     |                      |                      |                                     |                       | X                                | X                                 |
| Rowan Questionnaire         |                     |                     |                     |                     |                     |                      |                      |                                     |                       | X                                |                                   |
| Adverse Events              |                     | X                   | X                   | X                   | X                   | X                    | X                    | X                                   | X                     | X                                | X                                 |
| <b>Neonatal Procedures</b>  |                     |                     |                     |                     |                     |                      |                      |                                     |                       |                                  |                                   |
| Status of Baby              |                     |                     |                     |                     |                     |                      |                      |                                     | X                     |                                  | X                                 |
| Sex                         |                     |                     |                     |                     |                     |                      |                      |                                     | X                     |                                  |                                   |
| Feeding Method              |                     |                     |                     |                     |                     |                      |                      |                                     | X                     | X                                | X                                 |
| Neonatal measurements       |                     |                     |                     |                     |                     |                      |                      |                                     | X                     |                                  |                                   |
| Apgar Score                 |                     |                     |                     |                     |                     |                      |                      |                                     | X                     |                                  |                                   |
| Hypoglycaemia (<2.6mmol/l)  |                     |                     |                     |                     |                     |                      |                      |                                     | X                     |                                  | X                                 |
| NNU care                    |                     |                     |                     |                     |                     |                      |                      |                                     | X                     | X                                | X                                 |
| Jaundice                    |                     |                     |                     |                     |                     |                      |                      |                                     | X                     |                                  | X                                 |

|                            |  |  |  |  |  |  |  |  |   |   |   |
|----------------------------|--|--|--|--|--|--|--|--|---|---|---|
| Neonatal medical resources |  |  |  |  |  |  |  |  | X | X | X |
| Neonatal morbidities       |  |  |  |  |  |  |  |  | X |   | X |
| Discharge date             |  |  |  |  |  |  |  |  |   | X |   |
| Adverse Events             |  |  |  |  |  |  |  |  | X | X | X |

Figure 2: Schedule of Visits and Procedures for the EMERGE Trial

<sup>a</sup> Participants may be randomised up to 28 weeks gestation (+6 days)

<sup>b</sup> Additional 2 weekly visits may occur before delivery

<sup>c</sup> Visits that do not require an in person physical measurement, laboratory assessment or drug dispensation can be completed over the telephone

<sup>d</sup> The delivery visit should take place within 72 hours of birth

<sup>e</sup> The 4 week post-partum visit window is +/- 7days

<sup>f</sup> The 12 week post-partum visit window is +/- 4 weeks

<sup>g</sup> Lab tests should be completed at 32 gestational weeks (+/- 1 week) AND at 38 gestational weeks (+/- 1 week)

<sup>h</sup> The DTSQ will be administered at the 12 week visit, or as soon as possible thereafter

<sup>i</sup> Vital signs and height and weight measurements should be completed at 32 gestational weeks (+/- 1 week) AND at 38 gestational weeks (+/- 1 week), in line with routine antenatal clinic visits.

<sup>j</sup> Study drug dispensing should be completed every 4 weeks

<sup>k</sup> In cases where study visits are completed over the telephone, glucometer data should be downloaded at a subsequent in-person study visit

<sup>l</sup> Study Drug Return and Accountability should be completed every 4 weeks during the pre-natal study period

941

942 **8.4. Description of Study Procedures**

943

944 **8.4.1. Informed Consent**

945

946 The study will be conducted in accordance with the ethical principles that have their origin in the  
947 Declaration of Helsinki and in accordance with ICH-GCP. Eligible participants may only be included in  
948 the trial after providing written informed consent. Informed consent must be obtained prior to  
949 conducting any trial specific procedures and the process for obtaining informed consent must be  
950 documented in the patient's medical records (source documents which will be reviewed at the time of  
951 on-site monitoring visits).

952

953 The central ethics committee (EC) approved Patient Information Leaflet and Informed Consent Form  
954 (PIL and ICF) will be provided to potential participants, which the Principal Investigator and/or  
955 delegate will explain and discuss the nature of the study. Participants will have ample time to ask and  
956 have answered any questions by the investigator prior to making a decision regarding participation.

957

958 Upon providing consent, the ICF will be signed and dated by the participant, and the investigator who  
959 administered the ICF. The complete original ICF will be filed by the site in the site file, a copy of the  
960 ICF will be given to the participant and a copy will be filed in the participant's notes.

961

962 **8.4.2. Medical History**

963

964 A review of each participants medical history will be completed at the screening visit to document the  
965 following relevant medical conditions:

966

- 967 • Psychiatric disorders
- 968 • Asthma
- 969 • Gastroesophageal reflux disease
- 970 • Cardiovascular disease
- 971 • Irritable bowel syndrome
- 972 • Inflammatory bowel disease
- 973 • Coeliac disease
- 974 • Polycystic ovary syndrome
- 975 • Hypercholesterolemia
- 976 • Epilepsy
- 977 • Cancer
- 978 • Thyroid disorder
- 979 • Essential Hypertension
- 980 • Any longstanding medical condition for which the participant is currently taking treatment

981

982 A review of all concomitant medications will be documented by interview or review of medical records  
983 at the screening visit. Changes in medical history and concomitant medications will be reviewed at  
984 each subsequent visit.

985

986

987

988

989 **8.4.3. Physical Assessments**

990  
991 Standardised measurement of BP will be used. Weight will be measured in kg, height in meters and  
992 body mass index (BMI) as kg/m<sup>2</sup>. BMI will be calculated categorised according to World Health  
993 Organization (WHO) standards: underweight, <18.5 kg/m<sup>2</sup>; normal, 18.5–24.5 kg/m<sup>2</sup>; overweight  
994 (OW), 25–29.9 kg/m<sup>2</sup>; obese (OB), >30 kg/m<sup>2</sup>. Waist circumference will be taken using a tape  
995 measure half way between the hip bone and the lowest rib, about 5 cm (2 in) above the belly button.  
996

997 **8.4.4. OGTT**

998  
999 A 75g OGTT will be carried out at screening and 12 weeks (+/- 4 weeks) post-partum.  
1000 The OGTT at screening will determine the presence of GDM according to IADPSG/WHO 2013 criteria  
1001 based on any one of the following values: Fasting  $\geq 5.1$  and  $<7$ , 1 h  $\geq 10$ , and 2h  $\geq 8.5$  and  
1002  $<11.1$  mmol/l. Results of the post -partum OGTT will categorize participants as one of the following: 1)  
1003 Negative: fasting blood glucose (FBG)  $<5.6$  mmol/l, 2h blood glucose  $<7.8$  mmol/l; 2) Impaired fasting  
1004 glucose (IFG) FBG  $>5.6$   $<7$  mmol/l; 2h blood glucose  $<7.8$  mmol/l. 3) Impaired glucose tolerance FBG  
1005  $5.6$ - $7$  mmol/l; 2h blood glucose  $7.8$ - $11.1$  mmol/l. 4) Diabetic FBG  $>7$  mmol/l or 2h blood glucose  
1006  $>11.1$  mmol/l. We will use a fasting venous sample as venous glucose is more accurate than capillary  
1007 measurements.  
1008

1009 **8.4.5. Laboratory Tests**

1010  
1011 Lab tests should be completed at the randomisation visit, 32 gestational weeks (+/- 1 week) AND at  
1012 38 gestational weeks (+/- 1 week), and 12 weeks post-partum (+/- 4 weeks). If the participant is  
1013 administered steroids at 32 weeks gestation or 38 weeks gestation, defer lab tests for 48 hours.  
1014

1015 The following laboratory assessments will be analysed locally:

1016  
1017 Randomisation: HbA1c, fasting glucose, Insulin, c-peptide, total cholesterol, high density lipoprotein  
1018 (HDL) cholesterol, low density lipoprotein (LDL) cholesterol, triglycerides (Tg), urea, creatinine,  
1019 alanine aminotransferase (ALT), and aspartate transaminase (AST).  
1020

1021 32 weeks gestation: HbA1c, fasting glucose, total cholesterol, high density lipoprotein (HDL)  
1022 cholesterol, low density lipoprotein (LDL) cholesterol, triglycerides (Tg), urea, creatinine, alanine  
1023 aminotransferase (ALT), and aspartate transaminase (AST).  
1024

1025 38 weeks gestation: HbA1c, fasting glucose, total cholesterol, high density lipoprotein (HDL)  
1026 cholesterol, low density lipoprotein (LDL) cholesterol, triglycerides (Tg), urea, creatinine, alanine  
1027 aminotransferase (ALT), and aspartate transaminase (AST).  
1028

1029 12 weeks post-partum: fasting glucose, 2h glucose, fasting insulin, fasting c-peptide, HbA1c, total  
1030 cholesterol, high density lipoprotein (HDL) cholesterol, low density lipoprotein (LDL) cholesterol,  
1031 triglycerides (Tg).  
1032

1033  
1034 **8.4.6. Bio-banking**

1035  
1036 Participants at all trial sites will also be invited to partake in a GDM bio-banking sub-study which  
1037 involves obtaining maternal blood samples at randomisation and gestational age 38 weeks (+/- 1

1038 week) and also a cord blood sample at delivery. This is executed under a separate Ethics Committee  
1039 approved protocol and is executed as guided by local practice patterns and the availability of  
1040 resources (including staff).

1041

#### 1042 **8.4.7 Glucometer data**

1043

1044 Home capillary blood glucose measurements will occur as per routine practice in both groups using a  
1045 Contour Next One Glucometer (Ascensia). Capillary glucose values will be downloaded from the  
1046 glucometer at a subsequent in person study visit. The downloaded glucometer data will be stored and  
1047 analysed as part of a future observational study, and will not be monitored as part of trial care. All  
1048 clinically relevant glucometer readings will be reviewed at each on-site visit, as per usual care.

1049

#### 1050 **8.4.8. Study Drug Accountability**

1051

1052 A pill count will be performed by the study nurse/site staff at prenatal visits every 4 weeks and at the  
1053 12 week post-partum visit to facilitate study medication accountability and check compliance.

1054 Non-compliance is defined as less than 80% drug adherence of the participants maximum tolerated  
1055 dose.

#### 1056 **8.4.9. Neonatal Measurements**

1057

1058 The neonatal anthropometric measurements will be taken within 72 hours of delivery by trained  
1059 personnel and will include:

- 1060 • Crown-heel length
- 1061 • Head circumference
- 1062 • Weight

1063

1064 Where feasible, abdominal circumference and mid-upper arm circumference measurements will also  
1065 be taken.

1066

1067

**1068 8.5. Randomisation**

1069

1070 Participants will be randomly assigned to receive either metformin or placebo in a 1:1 ratio. Random  
1071 permuted blocks will be used to ensure similar numbers of participants in each intervention arm  
1072 throughout the trial and equal numbers in each arm by the end of the study. A minimisation strategy  
1073 will be used; this will allow equal numbers of participants with a BMI  $\leq$ / $>$ 30 and with a past history of  
1074 GDM to be distributed between groups.

1075

1076 A web-based randomisation system will be used to allow participating sites to login and obtain  
1077 allocated treatment numbers and participant IDs after confirming eligibility through inclusion and  
1078 exclusion criteria. The treatment number will correspond to a treatment kit at the site. This centralised  
1079 system will ensure allocation concealment; preventing trial staff from knowing which treatment group  
1080 will be allocated. Blocks of varying length will also be used to reduce the predictability of the allocation  
1081 sequence.

1082

**1083 8.6. Blinding**

1084

1085 This trial will be conducted in a double-blind fashion with placebo control identical to metformin tablets  
1086 to avoid bias in the assessment of outcomes. Site Investigators, site personnel, participants, and  
1087 outcome assessors will be blinded to treatment allocation.

1088

1089 In the case of an emergency, when knowledge of the participants's study treatment assignment is  
1090 essential for the clinical management of the participant, an investigator may un-blind a participant.  
1091 Any intentional or unintentional breaking of the blind will be recorded and reported to the sponsor as  
1092 soon as possible.

1093

**1094 8.6.1. Emergency Unblinding**

1095

1096 Emergency unblinding should only be undertaken when it is essential for the participants safety and  
1097 will only be provided for the treatment that requires unblinding. Most often, study drug interruption and  
1098 knowledge of the possible treatment assignments are sufficient to treat a study participant who  
1099 presents with an emergency condition. In case of unblinding, only those individuals who are  
1100 required to know treatment allocation may be given this information. Should the treating clinician  
1101 consider it necessary to un-blind for clinical care of the participant, the treating clinician will be un-  
1102 blinded. All other staff must remain blinded to treatment, including the participant. All participants  
1103 should resume study treatments after recovery if it is medically appropriate to do so and should be  
1104 followed until the end of the study.

1105

1106 Emergency unblinding will be available on the web-based randomisation service.

1107

**1108 8.7. Definition of end-of-trial**

1109

1110 The end of trial will be the date of the last visit of the last participant post-partum. The Sponsors  
1111 and/or Data safety and monitoring board/trial steering committee have the right at any time to  
1112 terminate the study for clinical or administrative reasons.

1113

1114 The end of the study will be reported to the approving EC and HPRA within 90 days of the end of the  
1115 clinical trial, or within 15 days if the study is terminated prematurely by the Sponsor or the Sponsors

1116 Representative. The EU Declaration of the End of Trial form must be used for this. The investigators  
1117 will inform participants and ensure that the appropriate follow-up is arranged for all involved.  
1118

### 1119 **8.7.1. Premature termination of the study**

1120

1121 The trial may be terminated prematurely if:

1122

- 1123 • new information about safety or efficacy appears
- 1124 • there is unsatisfactory progress of the study
- 1125 • if deemed necessary by the DSMB

1126

1127 If the trial ends prematurely then the HPRA and the approving EC will need to be informed as  
1128 required.

1129

### 1130 **8.8. Discontinuation/withdrawal of participants from study treatment**

1131

1132 Participants have the right to voluntarily discontinue study treatment or withdraw from the study at any  
1133 time for any reason without any consequences. The investigator has the right to discontinue a  
1134 participant from study treatment or withdraw a participant from the study at any time if it is in the best  
1135 interest of the participant, in circumstances such as:

1136

- 1137 1. any medical condition that the investigator or sponsor determines may jeopardise the  
1138 participant's safety if she continues receiving the study treatment
- 1139 2. ineligibility (either arising during the study or retrospectively having been overlooked at  
1140 screening)
- 1141 3. an adverse event which requires discontinuation of the study medication
- 1142 4. renal or hepatic concerns, shock or sepsis
- 1143 5. lack of compliance with the study and/or study procedures (e.g., dosing instructions, study  
1144 visits).

1145

1146 All participants who discontinue study medication will be invited to continue with protocol specified  
1147 follow-up procedures. The only exception to this requirement is when a participant withdraws consent  
1148 for all study procedures and contact.

1149

1150 If a participant discontinues study medication, or withdraws full study consent before completing the  
1151 study, the reason for this must be entered on the appropriate case report form (CRF) page.

1152

1153 If a participant is withdrawn due to an adverse event, the investigator will arrange for follow-up visits  
1154 until the adverse event has resolved or stabilised.

1155

1156

1157 **9. TREATMENT OF TRIAL PARTICIPANTS**

1158

1159 **9.1. Description of study treatments**

1160

1161 Once a diagnosis of GDM is made, participants will be randomised to either the placebo or metformin  
1162 arm and medication will commence and continue in addition to usual care.

1163

1164 **9.1.1. Usual Care**

1165

1166 All participants participating in the Emerge trial will receive usual care as follows: Following a  
1167 diagnosis of GDM participants will be seen by the diabetes team or trained delegated personnel within  
1168 1 week of diagnosis who will explain the diagnosis of GDM and its implications for her and her infant.  
1169 The DNS or trained delegated personnel will instruct participants on the use of a glucometer and the  
1170 participants will perform 7-point glucose testing before and 1 hour after meals and before bed.  
1171 Glucose targets of  $\leq 5$  mmol/l fasting and before meals and  $\leq 7$  mmol/l 1 hour after meals will be  
1172 given. Literature will be given and a contact name and telephone number given for any queries or  
1173 urgent matters. Participants will be seen either by the diabetes physician/DNS/or trained delegate to  
1174 impart dietary advice (medical nutritional therapy (MNT)) and information on exercise. Participants will  
1175 be supported by telephone contact from the DNS or trained delegate weekly throughout gestation and  
1176 attend at 2-4 weekly intervals at an antenatal/diabetes clinic.

1177

1178 Two weeks following the commencement of MNT and exercise, each participant is reviewed at the  
1179 diabetes/antenatal clinic to review blood sugars and decide on the need for insulin intervention. At this  
1180 time, an ultrasound scan to assess fetal growth is available, which contributes to the decision making  
1181 progress. If/when insulin is required; the participant is seen by the Investigator, DNS, or trained  
1182 delegate for instruction on insulin type and frequency, dealing with low and high glucose and use of a  
1183 glucagon pen, and sick day rules. Diet, exercise, and principles of monitoring are re-enforced at each  
1184 visit and participants are encouraged to phone the service as necessary.

1185

1186 At each subsequent clinic visit, the following measurements are taken; weight, blood pressure,  
1187 urinalysis, and glycated haemoglobin (HbA1C). Ultrasound scanning occurs every 4 weeks for fetal  
1188 growth. Mode of delivery is individualised according to mother and fetal health, fetal growth and  
1189 previous delivery type. A detailed plan is written in the case notes and protocols are available for  
1190 management of delivery of women with GDM; both treated with MNT only or requiring insulin.  
1191 Following delivery, all insulin is discontinued and participants resume usual diet and lifestyle.  
1192 Breastfeeding is encouraged and infant glucose is tested by heel prick within the first 4 hours and as  
1193 required thereafter. Prior to discharge participants are scheduled for a repeat 75g oral glucose  
1194 tolerance test (OGTT) at 12 weeks post-partum through the diabetes service.

1195

1196 **9.1.2. Treatment Group**

1197

1198 Participants randomised to the treatment arm will receive active metformin in addition to usual care.  
1199 Metformin tablets will be titrated according to a dosing schedule to achieve the pre-specified glucose  
1200 targets (fasting  $\leq 5$  mmol/l, 1hour post prandial  $\leq 7$  mmol/l). Tablets will be in 500mg doses and will  
1201 commence at 1 tablet per day (500mg) increasing to a maximum of 5 tablets per day (2500mg) as  
1202 follows:

1203

- 1203 • Stage 1) Day 1, 2: 1 tablet with breakfast each day
- 1204 • Stage 2) Day 3, 4: 1 tablet with breakfast and 1 tablet with dinner each day
- 1205 • Stage 3) Day 5, 6: 2 tablets with breakfast and 1 tablet with dinner each day



- 1206
- Stage 4) Day 7, 8: 2 tablets with breakfast and 2 tablets with dinner each day
- 1207
- Stage 5) Day 9, 10: 3 tablets with breakfast and 2 tablets with dinner each day
- 1208

1209 If a participant experiences uncomfortable side effects (e.g. diarrhoea or nausea) at any stage, the  
1210 site will instruct the participant to go back to the previous dose and then try again to increase the dose  
1211 after 4-7 days. If the participant cannot tolerate the study medication at the higher dose, but can  
1212 tolerate the study medication at a lower dose, the participant may continue at that lower dose for the  
1213 treatment period.

1214

### 1215 **9.1.3. Placebo Group**

1216

1217 Participants randomised to the placebo arm will receive placebo in addition to usual care. Placebo will  
1218 be titrated according to the dosing schedule to achieve the pre-specified glucose targets (fasting  
1219  $\leq 5\text{mmol/l}$ , 1hour post prandial  $\leq 7\text{mmol/l}$ ). Placebo tablets will commence at 1 tablet per day and will  
1220 be increased to a maximum of 5 tablets per day over 10 days as with the treatment group.

1221

### 1222 **9.1.4. Requirement for Insulin**

1223

1224 Insulin will be commenced in each group as per normal practice if 2 or more home glucose readings  
1225 are outside the pre-specified glucose targets (fasting  $\leq 5\text{mmol/l}$ , 1hour post prandial  $\leq 7\text{mmol/l}$ )  
1226 (without reason) despite maximum oral therapy and MNT at any clinic visit. For this reason, insulin is  
1227 considered a non-IMP in this trial (see safety reporting for NIMP section 10.3.3.). If insulin is initiated,  
1228 tablets will also be continued at the maximum tolerated dose. Off study metformin is unlikely to be  
1229 used as this is not routine clinical practice currently. The intervention will continue up to birth of the  
1230 infant or end of pregnancy due to pregnancy loss.

1231

1232

## 1233 **9.2. Formulation, packaging, and handling**

1234

1235 The IMPs are Glucophage (Metformin) 500mg film-coated tablets and placebo to match tablets  
1236 supplied to the trial by the marketing authorisation holder Merck Santé (France).

1237

1238 The tablets will be repacked for the trial into bottles containing 170 active or placebo tablets and each  
1239 bottle will be labelled according to Annex 13 requirements.

1240 The Sponsor has contracted MODEPHARMA for arranging the clinical trials packaging, labelling, QP  
1241 release and distribution of trial IMPs in compliance with Good Manufacturing Practice (GMP) and  
1242 Good Distribution Practice (GDP). Please refer to the Summary of product Characteristics and  
1243 Investigational Medicinal Product Dossier (IMPDP) for further details about the IMP manufacture and  
1244 labelling.

1245

### 1246 **9.3. Storage of study treatments(s)**

1247

1248 Metformin and placebo tablets are packaged in high density polyethylene (HDPE) bottles with a  
1249 desiccant cartridge inside. They must be stored at room temperature (below 30°C) in a secure  
1250 location with restricted access. A temperature log recording storage temperature should be  
1251 maintained. Any deviations from the normal range should be reported to the sponsor.

1252

### 1253 **9.4. Accountability of the study treatment(s)**

1254

1255 The study medication will be supplied to site as per the sponsor supply process. Shipment records  
1256 must be maintained by the investigator at the site. The investigator will use a standard prescription  
1257 form and the investigator/research delegate will collect the medication from its designated storage  
1258 space.

1259 Metformin and matching placebo will be dispensed by authorised personnel according to local  
1260 regulations. A dispensing log will be kept for each participant to document all pack numbers  
1261 dispensed to the participant.

1262

### 1263 **9.5. Assessment of compliance**

1264

1265 The investigator should promote compliance by counselling the participant to take the study drug as  
1266 prescribed. Participants will be provided with a medication instruction sheet to aid with the titration  
1267 phase of the study. The participant should be instructed to contact the investigator if unable for any  
1268 reason to take the study drug as prescribed. Treatment compliance will be assessed by confirmatory  
1269 tablet counts to be conducted at each study dispensing visit every 4 weeks post randomisation.

1270

1271 Participants will be asked to return all unused study drug and packaging at study dispensing visits, the  
1272 end of the study or at the time of study drug discontinuation. The Research Nurse or delegate will  
1273 perform a pill count and calculate adherence. Drug accountability will also be noted by the clinical  
1274 monitor during site visits and at the completion of the trial. Compliance of the participant with study  
1275 treatments will be assessed by maintaining return records. Non-compliance is defined as less than  
1276 80% drug adherence of the participants maximum tolerated dose. In the event of non-compliance,  
1277 women will be re-counselled about drug adherence.

1278

1279

#### 1280 **9.5.1. Missed Dose**

1281

1282 If the participant forgets to take a dose of Metformin / placebo she should wait for the next dose at the  
1283 usual time. She should not double the dose to make up the forgotten dose.

1284

### 1285 **9.6. Overdose of study treatment**

1286

1287 Overdose of metformin hydrochloride has occurred if the ingestion amount is greater than 50 grams  
1288 (100 x 500mg tablets). Hypoglycaemia has been reported in approximately 10% of cases, but no  
1289 causal association with metformin hydrochloride has been established. Lactic acidosis has been  
1290 reported in approximately 32% of metformin overdose cases. Metformin is dialyzable with a  
1291 clearance of up to 170 mL/min under good hemodynamic conditions. Therefore, haemodialysis may  
1292 be useful for removal of accumulated drug from participants in whom metformin over dosage is  
1293 suspected.

1294

1295 Available information concerning treatment of a massive over dosage of metformin is very limited. It  
1296 would be expected that adverse reactions of a more intense character including epigastric discomfort,  
1297 nausea and vomiting followed by diarrhoea, drowsiness, weakness, dizziness, malaise and headache  
1298 might be seen. Should those symptoms persist, lactic acidosis should be excluded. The drug should  
1299 be discontinued and proper supportive therapy instituted.

1300

### 1301 **9.7. Prior and concomitant therapy**

1302

- 1303 Throughout the study, investigators may prescribe any concomitant medications or treatments  
1304 deemed necessary to provide adequate supportive care except for those listed in Section 9.7.2.  
1305 Participants will be instructed to inform the investigator prior to starting any new medications. Any  
1306 medication, including non-prescription medication(s) and herbal product(s), other than the study  
1307 medication taken during the study will be recorded in the CRF from the date the participant signs  
1308 informed consent to the last visit, except those listed below which are expected pregnancy related  
1309 concomitant medications;  
1310
- 1311 a) Pain relief [entonox, pethidine, fentanyl (for epidural), bupivacaine (for epidural)]
  - 1312 b) Local Anesthesia for perineal repair
  - 1313 c) Prophylactic uterotonic administration or drugs for active management of the third stage of  
1314 labour i.e., oxytocin (syntocinon) 10 units IM or ergometrine maleate/oxytocin (Syntometrine)  
1315 500mcg/5 units IM
  - 1316 d) Ranitidine
  - 1317 e) Sodium Citrate
  - 1318 f) Routine vaccines in the baby (BCG/TB, Diphtheria, Tetanus, Pertussis, Haemophilus  
1319 Influenza B (Hib), Polio, Hep B, Pneumococcal (PCV), Meningococcal (Men B)
  - 1320 g) Maternal vaccinations
  - 1321 h) Vitamin K administration (baby only)
  - 1322 i) Anti D for mother
  - 1323 j) Over-the-counter antenatal multivitamins
- 1324  
1325

#### 1326 9.7.1. Permitted Medications/Non-Investigational Medicinal Products

1327  
1328 The following medications are permitted for routine use throughout the duration of the trial:

- 1329 1. Paracetamol
  - 1330 2. Aspirin
  - 1331 3. Low molecular weight heparin
  - 1332 4. Antihypertensives
  - 1333 5. Routine pregnancy supplements
  - 1334 6. Folic Acid
  - 1335 7. Vitamin D
  - 1336 8. Antacids
  - 1337 9. Prescribed medications for established chronic diseases
  - 1338 10. Insulin
- 1339

1340 Insulin taken for less than 72 hours will be recorded but will not be considered a primary outcome  
1341 measure.

#### 1343 9.7.2. Prohibited Medications

1344  
1345 The following medications are not permitted for routine use throughout the duration of the trial:

- 1346
  - 1347 • Non-study oral hypoglycaemic medications
  - 1348 • Intravascular contrast studies with iodinated materials
- 1349

1350 Intravascular contrast studies with iodinated materials can lead to acute alteration of renal function  
1351 and have been associated with lactic acidosis in patients receiving metformin. Metformin/placebo  
1352 must be discontinued prior to or at the time of the imaging procedure and not restarted until at least  
1353 48 hours after, provided that renal function has been re-evaluated and found to be stable.

1354

1355 If for any clinical reason the patient requires treatment with any of the above, the patient must  
1356 discontinue study treatment either temporarily or permanently and this must be documented in the  
1357 CRF.

1358

### 1359 **9.7.3. Cautionary Medications**

1360

1361 Some medicinal products, such as NSAIDs (including selective cyclo-oxygenase (COX) II inhibitors),  
1362 ACE inhibitors, angiotensin II receptor antagonists and diuretics (particularly) loop diuretics) may  
1363 adversely affect renal function and may increase the risk of lactic acidosis. When starting or using  
1364 such products in combination with metformin/placebo, monitoring of renal function may be required.

1365

1366 Medicinal products with intrinsic hyperglycaemic activity (e.g. systemic or local glucocorticoids and  
1367 sympathomimetics) may require more frequent blood glucose monitoring.

1368

1369 As metformin is a substrate of the OCT1 and OCT2 organic cation transporters, co-administration with  
1370 agents that are metabolised via these transporters may modify the efficacy of metformin.

1371

1372 Coadministration of metformin/placebo with inhibitors of OCT1 (such as verapamil) may reduce the  
1373 efficacy of metformin, and coadministration with inducers of OCT1 (such as rifampicin) may increase  
1374 the gastrointestinal absorption and efficacy of metformin. Coadministration of metformin/placebo with  
1375 inhibitors of OCT2 (such as cimetidine, dolutegravir, ranolazine, trimethoprim, vandetanib and  
1376 isavuconazole) may decrease the renal elimination of metformin thereby leading to an increase in the  
1377 plasma concentration of metformin. Coadministration of metformin/placebo with inhibitors of both  
1378 OCT1 and OCT2 (such as crizotinib and olaparib) may alter the efficacy and renal elimination of  
1379 metformin.

1379

1380 Caution is therefore advised, when these drugs are co-administered with metformin/placebo, as  
1381 metformin plasma concentration may increase. Investigators should review if dose adjustment of  
1382 metformin/placebo is required.

1383

## 1384 **10. SAFETY REPORTING**

1385

### 1386 **10.1. Definitions**

1387

#### 1388 **10.1.1. Adverse event (AE)**

1389

1390 Any untoward medical occurrence in a patient or clinical trial participant administered a medicinal  
1391 product and which does not necessarily have a causal relationship with this treatment.

1392

1393 An adverse event can therefore be any unfavourable and unintended sign (including an abnormal  
1394 laboratory finding, for example), symptom or disease temporally associated with the use of a  
1395 medicinal product, whether or not considered related to the medicinal product.

1396

1397 Each individual unintended sign, symptom or disease is considered a separate adverse event unless  
1398 an overarching diagnosis can be made for a collection of signs or symptoms that are clinically linked  
1399 and temporally related. The overarching diagnosis should be as specific as possible, using all  
1400 available clinical data.

1400

1401 All events in the mother and baby must undergo an assessment to determine if any of the  
1402 seriousness criteria (section 10.1.3) are met and each event must be reported to the Sponsor.

1403

1404 **10.1.2. Adverse reaction (AR)**

1405

1406 All untoward and unintended responses to a medicinal product related to any dose.

1407 The phrase 'responses to a medicinal product' means that a causal relationship between a study

1408 medication and an AE is at least a reasonable possibility, i.e., the relationship cannot be ruled out.

1409 All cases judged by either the reporting medically qualified professional or the sponsor as having a  
1410 reasonable suspected causal relationship to the study medication qualify as adverse reactions.

1411

1412 **10.1.3. Serious adverse event (SAE)**

1413

1414 Any untoward medical occurrence or affect that at any dose meets one or more of the following  
1415 criteria:

- 1416 • results in death,
- 1417 • is life-threatening\*,
- 1418 • requires hospitalisation (defined as >24 hour hospital stay, or formal admission to an  
1419 inpatient hospital area) or prolongation of existing hospitalisation,
- 1420 • results in persistent or significant disability or incapacity,
- 1421 • is a congenital anomaly or birth defect
- 1422 • is medically important\*\*

1423

1424 \* this refers to an event in which the participant was at risk of death at the time of the event; it does  
1425 not refer to an event which hypothetically might have caused death if it were more severe.

1426

1427 \*\*Some medical events may jeopardise the participant or may require an intervention to prevent one  
1428 of the above characteristics/consequences. Such events (hereinafter referred to as 'medically  
1429 important') should also be considered as 'serious' in accordance with the definition.

1430

1431 **10.1.4. Severe adverse events**

1432

1433 The term 'severity' is used here to describe the intensity of a specific event. This has to be  
1434 distinguished from the term 'serious'.

1435

1436 **10.1.5. Suspected unexpected serious adverse reactions**

1437

1438 An adverse reaction, the nature or severity of which is not consistent with the applicable product  
1439 information (e.g. investigator's brochure for an unauthorised investigational medicinal product or  
1440 summary of product characteristics for an authorised medicinal product).

1441

1442 **10.2. Evaluations of AEs and SAEs**

1443

1444 The investigator or delegate will report all AEs and SAEs to the sponsor as outlined in section 10.3,  
1445 except for those identified as outcomes identified below. Figure 3 outlines the cases whereby safety  
1446 exemptions may require AE/SAE reporting.

1447

1448 The following maternal events related to prenatal period, labour, delivery and the postnatal period are  
1449 commonly experienced and are therefore exempt from safety reporting unless fatal, life threatening,  
1450 medically important or results in persistent disability or incapacity:

1451

1452 i. Peripheral Oedema

- 1453 ii. Leg cramping
- 1454 iii. Back, hip or pelvic pain/discomfort or symphysis pubis dysfunction
- 1455 iv. Ketonuria, proteinuria, haematuria, glycosuria or leucocytes in the urine that do not
- 1456 require intervention
- 1457 v. Vaginal discharge, unless requiring treatment
- 1458 vi. Haemorrhoids or pregnancy related rectal bleeding
- 1459 vii. Varicose veins
- 1460 viii. Palpitations
- 1461 ix. Carpal tunnel syndrome
- 1462 x. Maternal tachycardia, transient hypotension, epidural related hypotension, nausea or
- 1463 vomiting occurring during the time of hospitalisation for labour or delivery
- 1464 xi. Group B Strep colonisation
- 1465 xii. Non-medically significant events associated with breast feeding
- 1466

1467 The following maternal events are considered study outcomes and collected on case report forms,  
 1468 and are therefore exempt from safety reporting unless fatal, life threatening, medically important or  
 1469 results in persistent disability or incapacity:

- 1470
- 1471 i. Symptoms common and expected during pregnancy, unless requiring hospitalisation:
- 1472 a. Nausea
- 1473 b. Heartburn
- 1474 c. Vomiting
- 1475 d. Flatulence
- 1476 e. Constipation
- 1477
- 1478 ii. Gastro-intestinal side effects from metformin therapy, unless requiring hospitalisation or
- 1479 cessation of study drug:
- 1480 a. Nausea
- 1481 b. Vomiting
- 1482 c. Diarrhoea
- 1483 d. Flatulence
- 1484
- 1485 iii. Anaemia, unless requiring hospitalisation (anaemia in pregnancy is defined as first trimester
- 1486 haemoglobin (Hb) less than 11.0 g/dl, second/third trimester Hb less than 10.5 g/dl, and
- 1487 postpartum Hb less than 10.0 g/dl, in line with British Committee for Standards in
- 1488 Haematology (BCSH) guidance)
- 1489 iv. Hypoglycaemia, unless requiring hospitalisation
- 1490 v. Polyhydramnios, unless requiring hospitalisation
- 1491 vi. Abnormal OGTT at the 12 week post partum follow up visit (+/- 4 weeks)
- 1492 vii. Hypertensive disorder of pregnancy (including elevated blood pressure, pregnancy induced
- 1493 hypertension (PIH) or Preeclampsia (PET)) not requiring hospitalisation, throughout the study
- 1494 period
- 1495 viii. Admission to hospital for pre-natal or post-natal care, including:
- 1496 a. Cardiotocograph monitoring (day case)
- 1497 b. BP monitoring
- 1498 c. Monitoring or management of elevated blood pressure, pregnancy induced
- 1499 hypertension or preeclampsia
- 1500 d. Bed rest
- 1501 e. External cephalic version
- 1502 f. Observation of placenta praevia or other placental location abnormality
- 1503 g. Unstable fetal lie *in utero*

- 1504 h. Antepartum Haemorrhage
- 1505 i. Postpartum haemorrhage
- 1506 j. Cholestasis
- 1507 k. Unexplained vaginal bleeding
- 1508 l. Iron infusion
- 1509 m. Betamethasone administration
- 1510 n. Premature rupture of membranes
- 1511 o. Anti-D administration
- 1512 ix. Wound infection (obstetric origin)
- 1513 x. Mastitis
- 1514 xi. Admission to hospital for delivery
  - 1515 a. Early stages of labour
  - 1516 b. Elective or emergency caesarean section (ELCS)
  - 1517 c. Induction of labour
  - 1518 d. Spontaneous labour
- 1519

1520 If a baby is admitted to the Neonatal Intensive Care Unit (NICU) for monitoring or care-giving  
1521 purposes only, with monitoring all within normal parameters, without evidence of any abnormality,  
1522 sign, diagnosis or therapeutic intervention, this is not considered an adverse event. All other  
1523 admissions to the NICU are considered medically important; the primary reason for NICU admission  
1524 should be reported as serious adverse events.

1525  
1526

1527 The following neonatal events are exempt from safety reporting unless fatal, life threatening,  
1528 medically important or results in persistent disability or incapacity:

1529

- 1530 i. Non-medically significant events related to delivery
- 1531 ii. Non-medically significant events occurring during the postpartum study follow-up
- 1532 phase
- 1533
- 1534

1535 The following neonatal events are considered study outcomes and collected on case report forms,  
1536 and are therefore exempt from safety reporting unless fatal, life threatening, medically important or  
1537 results in persistent disability or incapacity:

1538  
1539

- 1540 iii. Neonatal jaundice (with or without phototherapy)
- 1541 iv. Neonatal hypoglycaemia (defined as plasma glucose <2.6mmol/L on one or more
- 1542 occasions starting 30-60 minutes after birth)
- 1543

1544  
1545

1546  
1547

1548

1549

1550

|                                                                                                       | Non-Serious Event | Seriousness Criteria <sup>^</sup>       |                                 |                     |                  |       |     | Results in persistent or significant disability or incapacity | Congenital anomaly or birth defect |
|-------------------------------------------------------------------------------------------------------|-------------------|-----------------------------------------|---------------------------------|---------------------|------------------|-------|-----|---------------------------------------------------------------|------------------------------------|
|                                                                                                       |                   | New Hospitalisation                     | Prolongation of Hospitalisation | Medically important | Life-threatening | Fatal |     |                                                               |                                    |
| Symptoms common or expected during pregnancy: nausea, heartburn, vomiting, flatulence or constipation | No                | Yes                                     | Yes                             | Yes                 | Yes              | Yes   | Yes | Yes                                                           |                                    |
| Gastro-intestinal side effects from metformin therapy*, nausea, vomiting, diarrhoea and flatulence    | No                | Yes                                     | Yes                             | Yes                 | Yes              | Yes   | Yes | Yes                                                           |                                    |
| Anaemia                                                                                               | No                | Yes                                     | Yes                             | Yes                 | Yes              | Yes   | Yes | Yes                                                           |                                    |
| Cardiotocograph monitoring (day case)                                                                 | No                | No                                      | No                              | Yes                 | Yes              | Yes   | Yes | Yes                                                           |                                    |
| BP monitoring                                                                                         | No                | No                                      | No                              | Yes                 | Yes              | Yes   | Yes | Yes                                                           |                                    |
| Monitoring or management of elevated blood pressure, pregnancy induced hypertension or preeclampsia   | No                | No                                      | No                              | Yes                 | Yes              | Yes   | Yes | Yes                                                           |                                    |
| Bed rest                                                                                              | No                | No                                      | No                              | Yes                 | Yes              | Yes   | Yes | Yes                                                           |                                    |
| External cephalic version                                                                             | No                | No                                      | No                              | Yes                 | Yes              | Yes   | Yes | Yes                                                           |                                    |
| Betamethasone administration                                                                          | No                | No                                      | No                              | Yes                 | Yes              | Yes   | Yes | Yes                                                           |                                    |
| Anti-D administration                                                                                 | No                | No                                      | No                              | Yes                 | Yes              | Yes   | Yes | Yes                                                           |                                    |
| Iron Infusion                                                                                         | No                | No                                      | No                              | Yes                 | Yes              | Yes   | Yes | Yes                                                           |                                    |
| Hypoglycaemia                                                                                         | No                | Yes                                     | Yes                             | Yes                 | Yes              | Yes   | Yes | Yes                                                           |                                    |
| Polyhydramnios                                                                                        | No                | Yes                                     | Yes                             | Yes                 | Yes              | Yes   | Yes | Yes                                                           |                                    |
| Abnormal OGTT at the 12 week post partum follow up visit (+/- 4 weeks)                                | No                | No                                      | No                              | Yes                 | Yes              | Yes   | Yes | Yes                                                           |                                    |
| Observation of placenta praevia or other placental location abnormality                               | No                | No                                      | No                              | Yes                 | Yes              | Yes   | Yes | Yes                                                           |                                    |
|                                                                                                       | <b>Non-</b>       | <b>Seriousness Criteria<sup>^</sup></b> |                                 |                     |                  |       |     |                                                               |                                    |



|                                                                                                                                                                                               | Serious Event | New Hospitalisation | Prolongation of Hospitalisation | Medically important | Life-threatening | Fatal | Results in persistent or significant disability or incapacity | Congenital anomaly or birth defect |
|-----------------------------------------------------------------------------------------------------------------------------------------------------------------------------------------------|---------------|---------------------|---------------------------------|---------------------|------------------|-------|---------------------------------------------------------------|------------------------------------|
| Hypertensive disorder of pregnancy (including elevated blood pressure, pregnancy induced hypertension (PIH) or preeclampsia (PET)) not requiring hospitalisation, throughout the study period | No            | Yes                 | Yes                             | Yes                 | Yes              | Yes   | Yes                                                           | Yes                                |
| Unstable fetal lie <i>in utero</i>                                                                                                                                                            | No            | No                  | No                              | Yes                 | Yes              | Yes   | Yes                                                           | Yes                                |
| Antepartum haemorrhage                                                                                                                                                                        | No            | No                  | No                              | Yes                 | Yes              | Yes   | Yes                                                           | Yes                                |
| Postpartum haemorrhage                                                                                                                                                                        | No            | No                  | No                              | Yes                 | Yes              | Yes   | Yes                                                           | Yes                                |
| Unexplained vaginal bleeding                                                                                                                                                                  | No            | No                  | No                              | Yes                 | Yes              | Yes   | Yes                                                           | Yes                                |
| Premature rupture of membranes                                                                                                                                                                | No            | No                  | No                              | Yes                 | Yes              | Yes   | Yes                                                           | Yes                                |
| Cholestasis                                                                                                                                                                                   | No            | No                  | No                              | Yes                 | Yes              | Yes   | Yes                                                           | Yes                                |
| Wound Infection (Obstetric Origin)                                                                                                                                                            | No            | No                  | No                              | Yes                 | Yes              | Yes   | Yes                                                           | Yes                                |
| Mastitis                                                                                                                                                                                      | No            | No                  | No                              | Yes                 | Yes              | Yes   | Yes                                                           | Yes                                |
| Neonatal jaundice (with or without phototherapy)                                                                                                                                              | No            | No                  | No                              | Yes                 | Yes              | Yes   | Yes                                                           | Yes                                |
| Neonatal hypoglycaemia                                                                                                                                                                        | No            | No                  | No                              | Yes                 | Yes              | Yes   | Yes                                                           | Yes                                |

1551 **Figure 3: Instances requiring reporting for AE and SAE safety exemptions**

1552

1553 Yes = Event is reportable as an adverse event; No = Event is not reportable as an adverse event

1554 ^Where 'Yes' is indicated, the event must be reported to the Sponsor in an expedited manner

1555 \*If study drug is stopped, the event is reportable as an adverse event

1556

1557 Admission to hospital for symptoms suggestive of the early stages of labour, or admission to hospital for spontaneous labour, induction of labour or elective  
 1558 or emergency caesarean section are expected outcomes of pregnancy and are not reportable as safety events. All of these hospitalisations must be  
 1559 reviewed for other events that could be reportable adverse events.

1560

1561 **10.2.1. Assessment of seriousness**

1562

1563 The investigator should make an assessment of seriousness as defined in section 10.1.3.

1564

1565 **10.2.2. Assessment of causality**

1566

1567 All adverse events judged by either the investigator or the sponsor as having a reasonable suspected  
1568 causal relationship to an investigational medicinal product or with the non-investigational medicinal  
1569 product qualify as adverse reactions.

1570

1571 The investigator must make an assessment of whether the AE/SAE is likely to be related to treatment  
1572 according to the following definitions:

1573

- 1574 • Unrelated: Where an event is not considered to be related to the study medication.
- 1575 • Unlikely: where a temporal relationship to the study medication makes a relationship  
1576 improbable (but not impossible) and disease or other drugs provide plausible explanations.
- 1577 • Possible: Although a relationship to the study medication cannot be completely ruled out, the  
1578 nature of the event, the underlying disease, concomitant medication or temporal relationship  
1579 make other explanations possible.
- 1580 • Probable: The temporal relationship and absence of a more likely explanation suggest the  
1581 event could be related to the study medication.
- 1582 • Definite: Plausible temporal relationship and cannot be explained by disease or other drugs.

1583

1584 The causality assessment given by the investigator should not be downgraded by the sponsor. All  
1585 AEs/SAEs judged as having a reasonable suspected causal relationship (e.g. definite, possible,  
1586 probable) to the study medication will be considered as ARs/SARs. All AEs/SAEs judged as being  
1587 related (e.g. definite, possible, probable) to the non-IMP will also be considered to be ARs/SAR. All  
1588 AEs/SAEs judged as being related (e.g. definite, possible, probable) to an interaction between the  
1589 IMP and non-IMP will also be considered to be ARs/SAR.

1590

1591 Alternative causes such as natural history of the underlying disease, concomitant therapy, other risk  
1592 factors and the temporal relationship of the event to the treatment should be considered.

1593 The causality assessment will also be reviewed by the sponsor.

1594

1595 **10.2.3. Assessment of severity**

1596

1597 The investigator will make an assessment of severity for each AE/SAE and record this on the CRF  
1598 according to one of the following categories:

1599

- 1600 • Mild: An event that is easily tolerated by the participant, causing minimal discomfort and not  
1601 interfering with every day activities.
- 1602 • Moderate: An event that is sufficiently discomforting to interfere with normal everyday  
1603 activities.
- 1604 • Severe or medically significant: An event that prevents normal everyday activities.
- 1605 • Life threatening: An event that has life-threatening consequences

1606

1607 Note: the term 'severe', should not be confused with 'serious' which is a regulatory definition based on  
1608 participant/event outcome or action criteria

1609 **10.2.4. Assessment of expectedness**

1610

1611 An expectedness assessment will be carried out by the sponsor for each serious adverse reaction to  
1612 the IMP or an interaction between the IMP and non-IMP. The expectedness of a serious adverse  
1613 reaction will be determined by the sponsor according to the reference safety information as contained  
1614 in section 4.8. of the SmPC for Metformin.

1615

1616 **10.3. Reporting Responsibilities of the investigator**

1617

1618 **10.3.1. Adverse Events/Serious Adverse Events**

1619

1620 Any AE whose onset occurred after the time of informed consent and the last completed visit,  
1621 observed by the investigator or reported by the participant, whether or not attributed to the study  
1622 medication, will be recorded on the AE form in the CRF. The Site Investigator or delegate will follow  
1623 AE's and SAE's reported during the treatment period until resolved, considered stable, or completion  
1624 of participant participation in the EMERGE trial (i.e. 12 week Postpartum Visit). Follow up information  
1625 will be sought and submitted as it becomes available. All SAEs will be followed up until resolution or  
1626 they are clearly determined to be due to a participant's stable or chronic condition or intercurrent  
1627 illness(es).

1628

1629 The following information will be recorded in the adverse event form: Adverse event term, description,  
1630 date of onset, outcome, date of resolution, seriousness, severity, assessment of relatedness to the  
1631 study medication, assessment of relatedness to non-IMP, and assessment of relatedness to  
1632 interaction between IMP and non-IMP, and action taken with study drug. The Site Investigator is  
1633 responsible for the assessment of severity (intensity), causality/relatedness to IMP, non-IMP or an  
1634 interaction between IMP and non-IMP, for all AEs and SAEs. An SAE should also be substantiated by  
1635 a source document(s). Follow-up information should be provided as necessary.

1636

1637 It will be left to the investigator's clinical judgment whether or not an AE is of sufficient severity to  
1638 require the participant's removal from medication. A participant may also voluntarily withdraw from  
1639 medication due to what he or she perceives as an intolerable AE. If either of these occurs, the  
1640 participant must undergo an end-of-study assessment and be given appropriate care under medical  
1641 supervision until symptoms cease or the condition becomes stable.

1642

1643 **10.3.2. Timelines for reporting**

1644

1645 Adverse event information will be reported by site personnel in a timely fashion from the time the site  
1646 becomes aware of the event.

1647

1648 Serious adverse event information will be reported by site personnel within 24 hours to the sponsor  
1649 from the time the site becomes aware of the event, except for those that the protocol identifies as not  
1650 requiring immediate reporting. The site team are considered aware of an adverse event from the time  
1651 of first notification of the first member of the EMERGE site team, as per the Site Delegation Log. All  
1652 SAE's will be submitted by the site by completing the required fields on the AE CRF within 24 hours of  
1653 site awareness of the event. A valid SAE report must include all of the following:

1654

- 1655
- Adverse event term (based on what is known at the time of reporting)
  - 1656 • Seriousness criteria
  - 1657 • Severity

- 1658
- Causality assessments (for metformin/placebo, insulin [if applicable] and the potential
- 1659 interaction between metformin/placebo and insulin [if applicable])
- Investigator sign-off
- 1660
- 1661

1662 The immediate report will be followed by detailed, written reports. The immediate and follow-up

1663 reports will identify participants by unique code numbers.

1664

### 1665 **10.3.3. Safety Reporting for Non-IMP**

1666

1667 Insulin is considered a non-IMP and therefore must follow safety reporting guidelines for non-IMP.

1668 All AEs and SAEs considered by the investigator to be related to the non-IMP will be reported to the

1669 sponsor within the required timeframes (section 10.3.2).

1670 All AEs and SAEs which are considered by the investigator to be related to an interaction between

1671 IMP and non-IMP will be reported to the sponsor within the required timeframes (section 10.3.2).

1672

## 1673 **10.4. Reporting responsibilities of the sponsor**

1674

### 1675 **10.4.1. Regulatory Authorities**

1676

1677 The sponsor will keep detailed records of all adverse events which are reported to him by the

1678 investigator or investigators. The sponsor will report all SUSARs to the competent authority (HPRA) or

1679 EudraVigilance (as required) and the approving ethics committees concerned, and all principal

1680 investigators. Fatal or life-threatening SUSARs must be reported within 7 days.

1681

1682 If the initial report is incomplete, e.g. all the information/assessment has not been provided, the

1683 sponsor will submit a completed follow up report within an additional eight days.

1684

1685 SUSARs which are not fatal and not life-threatening are to be reported within 15 days to the sponsor.

1686 If significant new information on an already reported case is received by the sponsor, the clock starts

1687 again at day zero, i.e. the date of receipt of new information. This information will be reported as a

1688 follow-up report within 15 days.

1689

### 1690 **10.4.2. Safety Reports**

1691

1692 The sponsor will distribute masked expedited SUSAR reports, to each participating Site Investigator,

1693 as appropriate.

1694 SUSARs of which the treatment allocation of the participant is un-blinded should be reported by the

1695 sponsor to the national competent authority as well as the Ethics Committee.

1696

### 1697 **10.4.3. Annual Reports**

1698

1699 In addition to the expedited reporting above, the sponsor shall submit once a year throughout the

1700 clinical trial or on request, a safety report to the competent authority (HPRA) and ethics committees.

1701 The annual safety report will be presented in the development safety update reports (DSUR) format

1702 as per ICH guideline E2F - Note for guidance on DSUR.

1703

**1704 10.4.4. Safety reports for non-IMP**

1705 The sponsor will report SARs for non-IMP to the Regulatory Authorities or the marketing authorisation  
1706 holder. The sponsor will report SUSARs for interactions between the IMP and non-IMP to the  
1707 competent authority (HPRA) or EudraVigilance (as required) and Ethics Committee.

1708

1709 The sponsor will distribute masked expedited SUSAR reports for interactions between IMP and non-  
1710 IMP to each participating Site Investigator, as appropriate.

1711

**1712 10.5. Data safety monitoring board (DSMB)**

1713

1714 A DSMB is established and members will serve in an individual capacity and provide their expertise  
1715 and recommendations. The primary responsibilities of the DSMB will be to:

1716

- 1717 1. Become familiar with the research protocol and the procedures for data safety/monitoring.
- 1718 2. Review interim analyses of outcome data/adverse event reports.
- 1719 3. Make written recommendations to the TSC concerning the continuation, modification, or  
1720 termination of the trial.
- 1721 4. Consider any requests for release of interim trial data and make recommendations to the TSC  
1722 on the advisability of this.
- 1723 5. Review major proposed modifications to the study prior to their implementation (e.g.,  
1724 termination, increasing target sample size).
- 1725 6. Maintain confidentiality during all phases of DSMB review and deliberations.
- 1726 7. Review SAEs and SUSARs as appropriate

1727

1728 The responsibilities of the DSMB are outlined further in the DSMB charter. The membership of the  
1729 DSMB reflects the professions necessary to interpret the data and results from the study and to  
1730 evaluate participant safety fully.

1731

**1732 10.6. Trial Steering and Advisory Group**

1733

1734 The purpose of the TSAG is to provide strategic oversight for the overall direction and strategy for a  
1735 clinical trial. The primary responsibilities of the TSAG are:

- 1736 1. To contribute to the design of the study
- 1737 2. Increase information exchange at an early stage of trial development
- 1738 3. Increase the efficiency of clinical trial collaboration
- 1739 4. To monitor and review a) Recruitment progress, b) Quality control, c) Ethical amendments, d)  
1740 Financial aspects, and e) Publications
- 1741 5. To determine action points to facilitate the satisfactory progress of the EMERGE study.

1742

1743 This committee includes investigators, other experts not otherwise involved in the trial, and  
1744 representative of the sponsor. The responsibilities of the TSAG are outlined further in the TSAG  
1745 charter.

1746

**1747 11. STATISTICS**

1748

**1749 11.1. General Considerations**

1750 General description of the statistical methods is outlined below. A more detailed statistical analysis  
1751 plan (SAP) will be provided in a separate document. The SAP document will provide a more technical

1752 and detailed elaboration of the principal features of the planned analyses. The SAP will be finalised  
1753 prior to study enrolment, at the latest before any substantial information in the trial has accumulated.  
1754

1755 Analyses will be performed using R software.  
1756

## 1757 **11.2. Determination of sample size**

1758  
1759 Our sample size is based on the following; a) 35% of participants will require insulin in the control  
1760 arm, based on information from the MiG trial and data from University Hospital Galway and University  
1761 Hospital Cork; b) ability to detect a minimum of 33% relative risk reduction in proportion of participants  
1762 requiring insulin in the experimental (metformin) group (40% to 28% absolute reduction; in the MiG  
1763 trial only 40% of participants on metformin required insulin); c) significance level of 0.05 and 80%  
1764 power; d) drop-out rate of 5% or less; and e) non-adherence rate of 8% in metformin group. Based on  
1765 these assumptions, we require a total of 550 participants. This sample size will also have 80% power  
1766 to demonstrate a difference between the proportions of 12% or more (i.e. a reduction from 60-48%) in  
1767 the secondary outcome of excessive GWG.  
1768

1769 There are 7,000 deliveries annually in participating sites. From ATLANTIC DIP 1 we have identified a  
1770 prevalence of 12.4% for GDM using IADPSG criteria. In our previous universal screening project, we  
1771 had a consent rate of 75% but a testing rate of circa 50%. On a second study examining uptake rates  
1772 in primary v secondary care, the screening uptake rate was 88% for screening in secondary care.  
1773 With prevalence of 12% we would expect to diagnose upto 840 pregnancies with GDM annually. For  
1774 the secondary outcome of baseline to post-partum weight change, there is a greater concern with loss  
1775 to follow-up, as post-pregnancy follow-up rates have been reported in some studies to be less than  
1776 70%. For this outcome, even with a loss-to follow-up of 50% the resulting 138 per arm will have 80%  
1777 power, at the 0.05 significance level, to detect a minimum difference in mean weight change of  
1778 1.36kgs (assuming a standard deviation of the change in weight of 4kgs). However, every effort will  
1779 be made to achieve follow-up rates of >95% for post-partum follow-up, and we will implement a  
1780 number of strategies to enhance follow-up for this outcome (e.g. home monitoring of weight).  
1781

## 1782 **11.3. Analysis Sets**

### 1783 1784 **11.3.1. Intention-to-Treat Analysis Set** 1785

1786 The intention-to-treat analysis set, also termed full analysis set in the International Conference on  
1787 Harmonization (ICH) E9 guideline, will include all randomized participants.  
1788

### 1789 **11.3.2. Safety Analysis Set** 1790

1791 The safety analysis set will include all randomized participants who received at least one dose of  
1792 study medication.  
1793

## 1794 **11.4. Demographic and baseline disease characteristics**

1795  
1796 Demographic and baseline characteristics of the study population will be summarized using graphical  
1797 displays and descriptive statistics for each treatment group.  
1798  
1799

1800 **11.5. Effectiveness Analysis**

1801

1802 Suitable numerical and graphical techniques will be used to compare the primary and secondary  
1803 responses and the balance in explanatory variables at baseline. The primary analysis will be a two-  
1804 sample comparison of reduction in the proportion of participants needing insulin between treatment  
1805 and control arms using an exact test for a binomial response.

1806

1807 We will also conduct a logistic regression analysis, to adjust for differences of baseline co-variables  
1808 between treatment groups. Several strategies for including explanatory variables will be employed  
1809 where penalisation for multicollinearity will be achieved using ridge penalties. Following this the most  
1810 parsimonious subset of predictor variables will be identified using computationally intensive data  
1811 driven techniques such as the classification trees and the Lasso penalty.

1812

1813 A secondary exploratory analysis will involve a comparison of the time to insulin initiation between the  
1814 treatment groups, initially using the log-rank test and then the proportional hazards model in order to  
1815 adjust for patient characteristics as appropriate. Repeated measures ANOVA will be used to evaluate  
1816 the effect of intervention on secondary outcome of mean change in weight (from baseline to post-  
1817 partum follow-up).

1818

1819 **11.5.1. Primary Effectiveness Outcomes**

1820

1821 The primary efficacy outcome is a composite of:

- 1822 • Insulin initiation (Yes/No)
- 1823 • Fasting glucose value  $<5.1$  mmol/l and  $\geq 5.1$  mmol/l

1824

1825 **11.5.2. Secondary Effectiveness Outcomes**

1826

1827 Secondary efficacy outcomes include:

- 1828 • Maternal BMI, waist circumference, maternal gestational weight gain (GWG) blood glucose  
1829 status, insulin resistance status and metabolic syndrome postpartum
- 1830 • Proportion of infants with morbidities;
- 1831 • Infant birth weight
- 1832 • Proportion of maternal morbidities

1833

1834 **11.5.3. Health Economic Outcomes**

1835

1836 Health economic outcomes include:

- 1837 • EQ5D-5L
- 1838 • Quality Adjusted Life Years (QALYs)
- 1839 • Costs of healthcare associated with the intervention and control arms

1840

1841 **11.6. The level of statistical significance**

1842

1843 The level of statistical significance will be set at  $\alpha=0.05$  for all analyses i.e. a p-value  $<0.05$  with 95%  
1844 CI's not containing zero will be considered statistically significant.

1845

1846 **11.7. Procedure for accounting for missing, unused and spurious data**

1847

1848 An analysis of all missing data will be carried out to identify the likely missing data mechanism (e.g.  
missing completely at random, missing at random, and missing not at random). A suitable multiple

1849 imputation strategy will then be employed to determine the sensitivity of missing data on the inference  
1850 gleaned from the final model.  
1851

### 1852 **11.8. Health economic analysis**

1853 The Health Economic and Policy Analysis (HEPA) research team at NUI Galway have previous  
1854 experience, within an Irish healthcare context, in the design and conduct of economic evaluation  
1855 alongside randomised controlled trials. The health economic analysis will consist of trial-based  
1856 economic evaluation and will incorporate both cost effectiveness analysis and cost utility analysis to  
1857 compare the alternative treatment strategies: (1) metformin in addition to usual care for GDM (that is,  
1858 MNT and/or insulin); and (2) usual care for GDM. The economic evaluation will be undertaken in a  
1859 manner consistent with the guidelines issued by Health Information and Quality Authority (HIQA)  
1860 (2014) for the evaluation of technologies in Ireland. The basic tasks of the evaluation are to identify,  
1861 measure, value and compare the costs and outcomes of the alternatives being considered. Evidence  
1862 collected on resource use and clinical outcome measures alongside the trial will provide the basis for  
1863 the analysis over the trial follow up period. A healthcare provider perspective will be adopted with  
1864 respect to costing. This will reflect the healthcare resources consumed in operating both treatment  
1865 strategies including those relating to health professional time input, diagnostic testing, dietary,  
1866 exercise and prescription medication interventions (metformin and insulin), consumables and  
1867 materials, equipment and overheads. Healthcare resource use for both treatment arms will be  
1868 recorded alongside the trial. Unit costs will be applied to value resource use data and calculate the  
1869 various costs of care.  
1870

1871 As detailed above, significant attention will also be paid to collecting relevant data on health outcomes  
1872 alongside the trial. For the cost effectiveness analysis, the treatment strategies will be compared on  
1873 the basis of the effectiveness data for the primary clinical outcome. For the cost utility analysis,  
1874 effectiveness will be evaluated on the basis of Quality Adjusted Life-Years (QALYs), which is the  
1875 preferred outcome measure for economic evaluation as it allows for comparison of relative cost  
1876 effectiveness both within and beyond the clinical area of interest (Drummond et al, 2015). In this case,  
1877 patient responses to the EQ5D 5L questionnaire (Euroqol Group, 1990) at baseline and follow up will  
1878 be used to compute QALYs for the two treatment arms. The health economic analysis will employ the  
1879 standard approach for the comparison of alternative treatment strategies in terms of costs and health  
1880 outcomes. An incremental analysis will be undertaken to provide information on the marginal costs  
1881 and effects of the metformin plus standard GDM care intervention relative to the standard GDM care  
1882 alternative through the calculation of incremental cost effectiveness ratios. The analysis will report the  
1883 incremental cost effectiveness from a publicly funded health system perspective in line with HIQA  
1884 guidance (HIQA, 2014). Univariate, multivariate and probabilistic sensitivity analyses will be employed  
1885 to address uncertainty in the study. Budget impact analysis will be undertaken for metformin in  
1886 addition to usual care for GDM strategy.  
1887

### 1888 **12. DIRECT ACCESS TO SOURCE DATA/DOCUMENTS**

1889  
1890 The agreement with the investigator will include permission for trial related monitoring, audits, ethics  
1891 committee review and regulatory inspections, by providing direct access to source data and trial  
1892 related documentation. Consent from patients/legal representatives for direct access to data will also  
1893 be obtained. The patients' confidentiality will be maintained and will not be made publicly available to  
1894 the extent permitted by the applicable laws and regulations.  
1895  
1896



1897

1898 **13. DATA HANDLING AND RECORD KEEPING**

1899

1900 **13.1. Data collection, source documents and case report forms (CRF):**

1901

1902 Source documents for this study will include hospital records and procedure reports and data  
1903 collection forms. These documents will be used to enter data on the CRFs. All data entered on CRFs  
1904 must be entered legibly. If an error is made, the error will be crossed through with a single line in such  
1905 a way that the original entry can still be read. The correct entry will then be clearly inserted, and the  
1906 alterations will be initialled and dated.

1907

1908 Data reported on the CRF that are derived from source documents must be consistent with the source  
1909 documents or the discrepancies must be explained. All documents will be stored safely in confidential  
1910 conditions. On all study-specific documents other than the signed consent, the participant will be  
1911 referred to by the study participant identification number/code.

1912

1913 Patient identification on the CRF and questionnaires will be through participant initials and their  
1914 unique trial identifier allocated at the time of enrolment. No names or other identifying details will be  
1915 recorded on the CRF or in any other format.

1916

1917 **13.2. Data reporting**

1918

1919 The Data Manager will develop a Data Management Plan (DMP) which will detail all activities relating  
1920 to the management of the clinical data. All project specific data management documentation will be  
1921 filed in a Data Management File (DMF). The Data management team will also develop a Clinical Data  
1922 Management System (CDMS) to store the clinical data. This will be developed following the relevant  
1923 Data Management SOPs and adhering to ISO guidelines.

1924

1925 Once registered to a trial the patient will be provided with a unique, study-specific participant identifier  
1926 and this and their initials will be the only way the patient will be identified in the database. Data  
1927 collected on CRFs will be entered directly from the CRF onto the Clinical Data Management System  
1928 by data processors at the CRFG. Data entry is by single data entry. A 100% manual verification of all  
1929 data entered on the database will be performed prior to interim analysis to ensure consistency  
1930 between the original CRF and the database.

1931

1932 Data queries will be generated for the investigational site as required to clarify data discrepancies or  
1933 request missing information. The designated site staff will be required to respond to these queries and  
1934 send them back to the Data Management Team after they have been reviewed and signed by the  
1935 Principal Investigator/delegated staff member. Any amended information will then be entered in the  
1936 database. A copy of the signed query form should be retained with the CRF at the investigator site.

1937

1938 **14. RETENTION OF ESSENTIAL DOCUMENTS**

1939

1940 The investigator will maintain all trial records according to GCP and the applicable regulatory  
1941 requirements. The trial master file (TMF) will be established at the beginning of the trial by the  
1942 sponsor. The investigator site files will be maintained at the investigators site. These will contain the  
1943 essential documents in line with ICH-GCP. On completion of the trial the essential documents will be  
1944 maintained by the investigator for a period of at least 15 years or as otherwise specified in the  
1945 regulations.

1946

1947 Following confirmation, the sponsor will notify the investigator when they are no longer required to  
1948 maintain the files. If the investigator withdraws from the responsibility of keeping the trial records,  
1949 custody must be transferred to a person willing to accept responsibility and this must be documented  
1950 in writing to the sponsor.

1951

## 1952 **15. REGULATIONS, ETHICS, COMPLIANCE AND GOVERNANCE**

1953

1954 This clinical study was designed and shall be implemented and reported in accordance with the  
1955 principles of ICH GCP, the requirements and standards set out by the EU Directives 2001/20/EC and  
1956 2005/28/EC, the applicable regulatory requirements and their updates in Ireland and with the ethical  
1957 principles laid down in the Declaration of Helsinki.

1958

### 1959 **15.1. Sponsorship**

1960

1961 National University of Ireland, Galway (NUIG) is the Sponsor for the trial. The Chief Investigator will  
1962 take overall responsibility for the conduct of the trial.

1963

### 1964 **15.2. Indemnity**

1965

1966 The sponsor maintains clinical trial insurance coverage for this study in accordance with Irish laws  
1967 and regulations. The State Claims Agency, Clinical Indemnity Scheme, will provide clinical indemnity  
1968 for any harm caused to patients by the design of the research protocol. Additionally, indemnity to  
1969 allow for no-fault compensation will be provided for by NUI Galway for Irish sites. The Agreements put  
1970 in place between the Sponsors and individual participating sites will cover the indemnity provision for  
1971 negligent harm.

1972

### 1973 **15.3. Finance**

1974

1975 The study is funded by the Health Research Board. There is no industry funding provided for this  
1976 study.

1977

### 1978 **15.4. Regulatory and Ethical Approvals**

1979

1980 The trial will be conducted in accordance with the ethical principles that have their origin in the  
1981 Declaration of Helsinki. The protocol will be approved by a recognised Research Ethic Committees  
1982 (REC) for all participating sites before start of the study.

1983 The trial will be conducted in accordance with the EU Directive 2001/20/EC and 2005/28/EC and will  
1984 adhere to all regulatory requirements or updates as required. A CTA will be obtained from the HPRA  
1985 before the start of the trial.

1986

### 1987 **15.5. Audits and Inspections**

1988

1989 This trial may be subject to external auditing or inspections to ensure adherence to GCP. Access to  
1990 all trial-related documents will be given at that time.

1991

### 1992 **15.6. Ethical Considerations**

1993

1994 The vulnerability of this study group is fully appreciated and every effort will be undertaken to protect  
1995 their safety and well-being. In line with the applicable regulatory requirements consenting processes  
1996 will be standardised and a robust SOP for consenting participants will be adhered to.  
1997

### 1998 **15.7. Protocol Compliance**

1999  
2000 The investigators will conduct the study in compliance with the protocol given approval/favourable  
2001 opinion by the Ethics Committee and the appropriate regulatory authority and as per investigator  
2002 responsibilities outlined in ICH-GCP E6 R2. Changes to the protocol will require competent  
2003 authority/ethics committee approval/favourable opinion prior to implementation, except when  
2004 modification is needed to eliminate an immediate hazard(s) to patients. The TSC in collaboration with  
2005 the Sponsor will submit all protocol modifications to the competent authority/research ethics  
2006 committees for review in accordance with the governing regulations.  
2007

2008 Protocol compliance will be monitored by a monitor who will undertake site visits to ensure that the  
2009 trial protocol is adhered to and that necessary paperwork (CRF's, patient consent) are being  
2010 completed appropriately. Any deviations from the protocol will be reported to a sponsor representative  
2011 as per the process and timelines communicated.  
2012

### 2013 **15.8. Patient Confidentiality**

2014  
2015 In order to maintain confidentiality, all CRFs, questionnaires, study reports and communication  
2016 regarding the study will identify the patients by the assigned unique trial identifier and initials only.  
2017 Patient confidentiality will be maintained at every stage and will not be made publicly available to the  
2018 extent permitted by the applicable laws and regulations.  
2019

### 2020 **15.9. Good Clinical Practice**

2021  
2022 The trial will be carried out in accordance with the principles of the International Conference on  
2023 Harmonisation Good Clinical Practice (ICH-GCP) guidelines ([www.ich.org](http://www.ich.org)).  
2024

## 2025 **16. AUDITS AND INSPECTIONS**

2026  
2027 This trial may be subject to internal or external auditing or inspections procedure to ensure adherence  
2028 to GCP. Access to all trial-related documents will be given at that time.  
2029

## 2030 **17. ETHICS**

### 2031 **17.1. Approvals**

2032  
2033 Required documents including the protocol, ICF, participant information leaflet, investigational  
2034 medicinal product dossier, investigators brochure and any other required documents will be submitted  
2035 to a recognised research ethics committee and the competent authority for written approval.  
2036  
2037

2038 The sponsor will submit and obtain approval from the above parties for substantial amendments to the  
2039 original approved documents.

2040

2041 **17.2. Benefits and risks assessment**

2042

2043 Participants with a contraindication to the use of metformin will be excluded from the trial (see section  
2044 8.2.3.) If such maternal contraindications develop, the study medication will be discontinued. Reduced  
2045 vitamin B12 levels due to metformin use are not expected in this trial as this has been documented  
2046 only in patients with long-term metformin use (4-6 years) (Tomkin et al. 1971). In order to reduce the  
2047 known gastrointestinal side effects of metformin use, the dose will be titrated slowly upwards in  
2048 500mg increments up to 2500mg over 10 days.

2049

2050 Potential benefits for trial participants include delayed insulin initiation, reduced dose of insulin  
2051 required, or insulin not required, hence minimising the risks associated with insulin use on maternal  
2052 and neonatal outcomes.

2053

2054 **17.3. Participant confidentiality**

2055

2056 The trial staff will ensure that the participants' anonymity is maintained. The participants will be  
2057 identified only by initials and a participant's identification number on the CRF and any database. All  
2058 documents will be stored securely. The study will comply with the General Data Protection Regulation  
2059 (GDPR) and any applicable data protection updates. Information on GDPR and rights of the  
2060 participant will be provided to the participant on the ICF.

2061

2062 **18. CLINICAL STUDY REPORT AND PUBLICATION POLICY**

2063

2064 The results of this study will be disseminated to a wide audience locally nationally and internationally.  
2065 Initially the results will be shared with the key stakeholders in the Disciplines of Medicine, Obstetrics,  
2066 and economics and with a wider diabetes audience locally through the recently established Galway  
2067 Diabetes Research Centre (GDRC). Results will be presented to the regional Diabetes Services  
2068 Implementation group (DSiG). Nationally outcomes will be discussed with key workers and decision  
2069 makers in the Health Services Executive (HSE) especially the lead for Quality and Improvement,  
2070 the lead for Diabetes and the lead for obstetrics. We will communicate outcomes with the national  
2071 professional body in diabetes, the diabetes subsection of the Irish Endocrine Society, the Institute of  
2072 Obstetrics and Gynaecology, and the Faculty of Paediatrics.

2073

2074 The results will be presented at national Diabetes, Obstetric, and Health Economics meetings. There  
2075 will be dissemination in peer reviewed journals in Diabetes Obstetrics and Health Economics. We will  
2076 aim for journals of high impact factor e.g. Lancet, NEJM, Diabetes Care, Diabetologia and JCEM.  
2077 Internationally the results will be shared at the American, British and European meetings in Diabetes  
2078 Obstetrics and Health Economics in particular the ADA EASD and DPSG through poster and podium  
2079 presentations. We will also work with the Diabetes Federation of Ireland for dissemination using the  
2080 media of radio television and print to reach participants with prior and current GDM. Dissemination in  
2081 the Irish Times Medical Supplement will be important to reach a wide audience including patient's  
2082 professionals and policy makers.

2083

2084

2085

2086

2087

2088

2089 **19. REFERENCES**

- 2090 ADA. American Diabetes Association Position statement: Gestational Diabetes Mellitus. Diabetes  
2091 Care. 2004;27(Suppl 1):S88-S90.
- 2092 Bellamy L, Casas J-P, Hingorani AD, Williams D. Type 2 diabetes mellitus after gestational diabetes:  
2093 a systematic review and meta-analysis. Lancet. 2009; 373(9677):1773 - 9.
- 2094 Bradley C(1994). The Diabetes Treatment satisfaction Questionnaire: DTSQ. In Bradley C (Ed)  
2095 (1994). Handbook of Psychology and Diabetes: a guide to psychological measurement in diabetes  
2096 research and practice. Chur. Switzerland: Harwood Academic Publishers.
- 2097 Camelo Castillo W, Boggess K, Stürmer T, Brookhart MA, Benjamin DK Jr, Jonsson Funk M.  
2098 Association of Adverse Pregnancy Outcomes With Glyburide vs. Insulin in Women With Gestational  
2099 Diabetes. JAMA Pediatr. 2015 May;169(5):452-8.
- 2100 Carmody L, Egan AM, Kirwan B, Dunne F. Atlantic Dip: Postpartum Screening in Women with  
2101 Gestational Diabetes: Who Attends and Why? [abstract]. Diabetes. 2014; 63 (Suppl 1): A342
- 2102 Chiswick C, Reynolds RM, Denison F, Drake AJ, Forbes S, Newby DE, Walker BR, Quenby S, Wray  
2103 S, Weeks A, Lashen H, Rodriguez A, Murray G, Whyte S, Norman JE. Effect of metformin on  
2104 maternal and fetal outcomes in obese pregnant women (EMPOWaR): a randomised, double-blind,  
2105 placebo-controlled trial. Lancet Diabetes Endocrinol. 2015 Oct;3(10):778-86
- 2106 Clausen TD, Mortensen EL, Schmidt L, Mathiesen ER, Hansen T, Jensen DM, Damm P. Cognitive  
2107 function in adult offspring of women with gestational diabetes--the role of glucose and other factors.  
2108 PLoS One. 2013 Jun 28;8(6):e67107.
- 2109 Clausen TD, Mathiesen ER, Hansen T, Pedersen O, Jensen DM, Lauenborg J, Schmidt L, Damm  
2110 P. Overweight and the metabolic syndrome in adult offspring of women with diet-treated gestational  
2111 diabetes mellitus or type 1 diabetes. J Clin Endocrinol Metab. 2009 Jul;94(7):2464-70
- 2112 Coetzee EJ, Jackson WPU. Oral hypoglycaemics in the first trimester and fetal outcome. S Afr Med J  
2113 1984; 65:635-637.
- 2114 Crowther CA, Hiller JE, Moss JR, McPhee AJ, Jeffries WS, Robinson JS. Australian Carbohydrate  
2115 Intolerance Study in Pregnant Women (ACHOIS) Trial Group. Effect of treatment of gestational  
2116 diabetes mellitus on pregnancy outcomes. N Engl J Med 2005;352:2477-2486.
- 2117 Dennedy C Dunne F. ATLANTIC DIP: Raised Body mass index (BMI) is associated with adverse  
2118 maternal and infant outcomes in glucose tolerant women applying HAPO criteria. JCEM 2012;  
2119 97(4):E608-612.
- 2120 Drummond, M.F., Sculpher, M.J., Torrance, G.W., O'Brien, J., Stoddart, G.L.: Methods for the  
2121 Economic Evaluation of Health Care Programmes. Oxford University Press. (2005).
- 2122 Egan AM, Dennedy MC, Al-Ramli W, Heerey A, Dunne F. Atlantic DIP: gestational weight gain and  
2123 pregnancy outcomes in women with pregestational and gestational diabetes mellitus. JCEM 2013 (in  
2124 press).
- 2125 EuroQol Group. EuroQol-a new facility for the measurement of health-related quality of life. Health  
2126 Policy 1990;16:199-208)

- 2127 Gilbert C, Valois M, Koren G. Pregnancy outcome after first-trimester exposure to metformin: a  
2128 metaanalysis. *Fertil Steril* 2006; 86: 658-663
- 2129 Gillespie P, Cullinan J, Avalos G, Dunne F. The effect of Gestational Diabetes on Maternity Care  
2130 Costs. *Diabetes Care* 2013.
- 2131 Glibenclamide, metformin, and insulin for the treatment of gestational diabetes: a systematic review  
2132 and meta-analysis. Balsells M, García-Patterson A, Solà I, Roqué M, Gich I, Corcoy R. *BMJ*. 2015  
2133 Jan 21;350:h102.
- 2134 Glueck CJ, Goldenberg N, Pranikoff J, Loftspring M, Sieve L, Wang P. Height weight and motor-social  
2135 development during the first 18 months of life in 126 infants born to 109 mothers with polycystic ovary  
2136 syndrome who conceived on and continued metformin through pregnancy. *Hum Reprod* 2004; 19:  
2137 1323- 1330.
- 2138 Goh L E J, Sadler L, Rowan J. Metformin for gestational diabetes in routine clinical practice. *Diabetic*  
2139 *Medicine* 2011; 1082-1087.
- 2140 Gutzin SJ, Kozer E, Magee LA, Feig DS, Koren G. The safety of oral hypoglycaemic agents in the  
2141 first trimester of pregnancy: a meta-analysis. *Can J Clin Pharmacol* 2003; 10: 179-183
- 2142 Health Information Quality Assessment (HIQA): Guidelines for the Economic Evaluation of Health  
2143 Technologies in Ireland. 2010. Available online: [http://www.hiqa.ie/publication/guidelines-](http://www.hiqa.ie/publication/guidelines-economicevaluation-healthtechnologies-Ireland)  
2144 [economicevaluation- healthtechnologies- Ireland.](http://www.hiqa.ie/publication/guidelines-economicevaluation-healthtechnologies-Ireland)
- 2145 International association of diabetes and pregnancy study groups recommendations on the diagnosis  
2146 and classification of hyperglycemia in pregnancy. *Diabetes Care*. 2010; 33: 676-682
- 2147 Juan G, Qing L, Ling F. Metformin vs Insulin in the management of gestational diabetes: A meta-  
2148 analysis. *PLOS one* 2013; 8(5); e64585.
- 2149 Kgosidialwa O, Egan AM, Carmody L, Kirwan B, Gunning P, Dunne FP. Treatment With Diet and  
2150 Exercise for Women With Gestational Diabetes Mellitus Diagnosed Using IADPSG Criteria. *J Clin*  
2151 *Endocrinol Metab*. 2015 Dec; 100(12):4629-36
- 2152 Krakowiak P, Walker CK, Bremer AA, Baker AS, Ozonoff S, Hansen RL, Hertz-Picciotto I. Maternal  
2153 metabolic conditions and risk for autism and other neurodevelopmental disorders. *Pediatrics*. 2012  
2154 May;129(5):e1121-8.
- 2155 Lauenborg J, Jørgensen MK, Damm P, Major-Pedersen A, Eiberg H, Urhammer S, Pedersen O,  
2156 Hansen T. The influence of parental history of diabetes and offspring birth weight on offspring glucose  
2157 metabolism in adulthood. *Acta Obstet Gynecol Scand*. 2011 Dec;90(12):1357-63.
- 2158 Landon MB, Spong CY, Thom E et al. A multicentre randomized trial of treatment for mild gestational  
2159 diabetes. *N Engl J Med* 2009; 361:1339-1348.
- 2160 Latif L, Hyer S, Shehata H. Metformin effects on treatment satisfaction and quality of life in gestational  
2161 diabetes. *The British Journal of Diabetes & Vascular Disease*. Published online before print. Available  
2162 from <http://intldvd>.
- 2163 Metzger BE, Lowe LP, Dyer AR. Hyperglycemia and adverse pregnancy outcomes. *N Engl J*  
2164 *Med*. 2008; 358: 1991-2002

- 2165 Noctor E, Crowe C, Carmody L, Wickham B, Avalos G, Gaffney G, O Shea P, Dunne F. ATLANTIC  
2166 DIP: the prevalence of pre-diabetes/diabetes up to 5 years post-partum in women with previous  
2167 gestational diabetes along the Atlantic coast. *Diabetologia* 2012; 55(1); S442 1077.
- 2168 Noctor E, Crowe C, Carmody LA, Kirwan B, O'Dea A, Glynn LG, McGuire BE, O'Shea PM, Dunne FP.  
2169 ATLANTIC-DIP: prevalence of metabolic syndrome and insulin resistance in women with previous  
2170 gestational diabetes mellitus by International Association of Diabetes in Pregnancy Study Groups  
2171 criteria. *Acta Diabetol.* 2015 Feb;52(1):153-60
- 2172 O Reilly M, Avalos G, O Sullivan EP, Gaffney G, Dennedy MC, Dunne F. High prevalence of abnormal  
2173 glucose intolerance postpartum is reduced by breast feeding in women with prior GDM. *European J of*  
2174 *Endocrinology* 2011; 165:953-959.
- 2175 O Sullivan EP, Avalos G, O Reilly M, Dennedy C, Dunne F. ATLANTIC DIP: The prevalence and  
2176 outcomes of gestational diabetes mellitus using new diagnostic criteria. *Diabetologia* 2011;  
2177 54(7):1670- 1675.
- 2178 O'Dea A, Tierney M, McGuire B, Newell JN, Glynn L, Gibson I, Dunne F. An evaluation of Croi  
2179 MyAction community lifestyle modification programme compared to standard care to reduce  
2180 progression to diabetes/pre-diabetes in women with prior gestational diabetes mellitus (GDM). *Irish*  
2181 *Journal of Medical Science.* 2014; 183 (Suppl 9): S461
- 2182 Pioglitazone, D-chiro-inositol) for women with polycystic ovary syndrome, oligo amenorrhoea and  
2183 subfertility. *Cochrane Database Syst Rev* 2010; CD003053.
- 2184 Rowan J, Rush E, Obolonkin V, Battin M, Wouldes T, Hague W. Metformin in Gestational Diabetes:  
2185 The offspring follow-up (MiG TOFU). *Diabetes Care* 2011;34: 2279-2284.
- 2186 Rowan J, Rush E, Obolonkin V, Battin M, Wouldes T, Hague W. Metformin in Gestational Diabetes:  
2187 The offspring follow-up (MiG TOFU). *Diabetes Care* 2011;34: 2279-2284.
- 2188 Royal College of Obstetricians and Gynaecologists (2014). The Investigation and Management of the  
2189 Small-for-Gestational-Age Fetus, Greentop Guideline No. 31. 2ND edn. Royal College of  
2190 Obstetricians and Gynaecologists, London.
- 2191 Sacks DA, Hadden DR, Maresh M, Deerochanawong C, Dyer AR, Metzger BE, Lowe LP, Coustan  
2192 DR, Hod M, Oats JJ, Persson B, Trimble ER; HAPO Study Cooperative Research Group Frequency  
2193 of gestational diabetes mellitus at collaborating centres based on IADPSG consensus panel-  
2194 recommended criteria: the Hyperglycemia and Adverse Pregnancy Outcome (HAPO) Study. *Diabetes*  
2195 *Care.* 2012 Mar;35(3):526-8. doi: 10.2337/dc11-1641.
- 2196 Tang T, Lord JM, Normal RJ, Yasmin E, Balen AH. Insulin-sensitizing drugs (metformin, rosiglitazone,  
2197 Tierney M, O'Dea A, Glynn L, Carmody L, McGuire B, Dunne F. The prevalence rate and uptake of  
2198 screening for gestational diabetes mellitus (GDM) in primary versus secondary care. *Irish Journal of*  
2199 *Medical Science.* 2014; 183 (Suppl 9): S447
- 2200 Tomkin GH. Et al. Vitamin-B12 status of patients on long-term metformin therapy. *BMJ* 1971;2685-  
2201 687)

- 2202 Vaarasmaki M, Pouta A, Elliot P. Adolescent manifestations of the metabolic syndrome among  
2203 children born to women with gestational diabetes in a general-population birth cohort. Am J Epidemiol  
2204 2009; 169:1209-15.
- 2205 Vanky E, Zahlse K, Spigset O, Carlsen SM. Placental passage of metformin in women with  
2206 polycystic ovary syndrome. Fertil Steril 2005; 83: 1575-1578.
- 2207 Zhu Y, Olsen SF, Mendola P, Yeung EH, Vaag A, Bowers K, Liu A, Bao W, Li S, Madsen C, Grunnet  
2208 LG, Granström C, Hansen S, Martin K, Chavarro JE, Hu FB, Langhoff-Roos J, Damm P, Zhang C.  
2209 Growth and obesity through the first 7 y of life in association with levels of maternal glycemia during  
2210 pregnancy: a prospective cohort study. Am J Clin Nutr. 2016 Mar;103(3):794-800.
- 2211
- 2212
- 2213
- 2214
- 2215
- 2216
