# Supplementary material
Source: PubMed Central journal article supplement (PMC10548359)
Supplement: jama-e2319869-s004.pdf [file jama-e2319869-s004.pdf]

## **Data Sharing Statement**

### **Data**

**Data available:** No

### **Additional Information**

**Explanation for why data not available:** No
